# Supplementary material
Source: PubMed Central journal article supplement (PMC3068231)
Supplement: NIHMS249602-supplement-2_si_002.pdf [file NIHMS249602-supplement-2_si_002.pdf]

## Practical Synthesis of PC190723, An Inhibitor of the Bacterial Cell Division Protein FtsZ

Nohemy A. Sorto, Marilyn M. Olmstead and Jared T. Shaw\*

*Department of Chemistry, One Shields Ave, University of California, Davis, CA 95616*[shaw@chem.ucdavis.edu](mailto:shaw@chem.ucdavis.edu)**Supporting Information****List of Contents**

|                                                         |                     |
|---------------------------------------------------------|---------------------|
| <b>Materials and Instrumentation</b>                    | <b>Page S1-S2</b>   |
| <b>Experimental Procedures</b>                          | <b>Page S2-S4</b>   |
| <b><sup>1</sup>H NMR and <sup>13</sup>C NMR Spectra</b> | <b>Page S5-S33</b>  |
| <b>Complete References 7a, 7b, and 10.</b>              | <b>Page S34</b>     |
| <b>Crystallographic Data</b>                            | <b>Page S35-S36</b> |

Materials: Unless otherwise specified, all commercially available reagents were used as received. All reactions using dried solvents were carried out under an atmosphere of argon in flame-dried glassware with magnetic stirring. Dry solvent was dispensed from a solvent purification system that passes solvent through two columns of dry neutral alumina. Instrumentation: <sup>1</sup>H and <sup>13</sup>C NMR spectra were obtained on a 300, 400, 600MHz NMR spectrometer. Chemical shifts (δ) are reported in parts per million (ppm) relative to TMS or DMSO-d (CHCl<sub>3</sub>, s, δ 0.00), (DMSO-d, m, δ 2.50). Multiplicities are given as: s (singlet), d (doublet), t (triplet), dd (doublet of doublets), dt (doublet of triplet), m (multiplet), brs (broad singlet). <sup>13</sup>C NMR chemical shifts are reported relative to CDCl<sub>3</sub> (t, δ 77.16) DMSO-d (m, δ 40.0) unless otherwise noted. For the <sup>19</sup>F NMR data, trifluoroacetic acid (TFA) was used as an internal standard. High resonance mass spectra were recorded on positive and negative ESI mode in methanol or acetonitrile unless otherwise noted. Melting points were taken on an EZ-melting apparatus and were uncorrected. Infrared spectra were taken neat. Silica gel chromatographic purifications were performed by flash chromatography with silica gel (Silicycle, 40–63 μm) packed in glass columns. The eluting solvent for each purification was determined by thin layer chromatography (TLC) on glass plates coated with EMD silica gel 50F254 and visualized by ultraviolet. The following abbreviations are used throughout: ethyl acetate (EtOAc), diisopropylethylamine ((i-Pr)<sub>2</sub>NEt).

**Experimental:**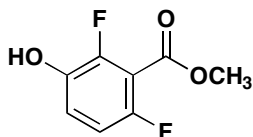

**2,6-Difluoro-3-hydroxy-benzoic acid methyl ester (5).** Compound **11** (0.461 g, 1.99 mmol) was dissolved in a 50:50 mixture of MeOH and concentrated H<sub>2</sub>SO<sub>4</sub> (20 mL total volume) the mixture was allowed to stir overnight. The solvent was evaporated *in vacuo* and then extracted 3x with CH<sub>2</sub>Cl<sub>2</sub> yielding a light brown oil (0.342 g, 91%): <sup>1</sup>H NMR (400 MHz, CDCl<sub>3</sub>) δ 7.08 (td, *J* = 9.3, 5.2, 1H), 6.81 (td, *J* = 9.2, 2.0, 1H), 6.45 (brs, 1H), 3.96 (s, 3H); <sup>13</sup>C NMR (101 MHz, CDCl<sub>3</sub>) δ 162.9, 153.6 (dd, *J* = 249.7, 4.6), 148.7 (dd, *J* = 250.5, 6.4), 140.6 (dd, *J* = 13.9, 3.4), 120.5 (dd, *J* = 9.6, 3.9), 111.8 (dd, *J* = 23.4, 4.1), 110.4 (dd, *J* = 19.1, 15.0), 53.1 (d, *J* = 2.7); IR (neat) 3408, 1751, 1633 cm<sup>-1</sup>; R<sub>f</sub> 0.708 in 50% EtOAc/hexanes; HRMS (ESI) *m/z* calcd for C<sub>8</sub>H<sub>6</sub>F<sub>2</sub>O<sub>3</sub> (M + H)<sup>+</sup> 189.0360, found 189.0358.

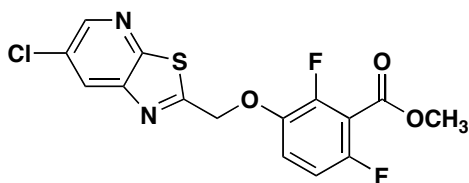

**3-(6-Chloro-thiazolo[5,4-b]pyridin-2-ylmethoxy)-2,6-difluoro-benzoic acid methyl ester (19).** Phenol **5** (0.053 g, 0.282 mmol) was dissolved in 5 mL of dry CH<sub>3</sub>CN followed by the addition of Cs<sub>2</sub>CO<sub>3</sub> (0.275 g, 0.844 mmol). Compound **2** (0.053 g, 0.242 mmol) was added to the mixture and stirred for 1.5 h at 65 °C. The solution was filtered and the filtrate was concentrated and purified by flash chromatography (100% CH<sub>2</sub>Cl<sub>2</sub>), yielding a yellow solid (0.056 g, 62%): mp 144-145 °C; <sup>1</sup>H NMR (400 MHz, CDCl<sub>3</sub>) δ 8.58 (d, *J* = 2.1, 1H), 8.24 (d, *J* = 2.1, 1H), 7.18 (td, *J* = 9.0, 5.0, 1H), 6.89 (td, *J* = 9.0, 1.8, 1H), 5.49 (s, 2H), 3.97 (s, 3H); <sup>13</sup>C NMR (101 MHz, CDCl<sub>3</sub>) δ 170.6, 161.7 (d, *J* = 1.3), 156.1, 155.3 (dd, *J* = 248.46, 5.05), 151.1 (dd, *J* = 258.7, 6.6), 146.7, 146.4, 142.4 (dd, *J* = 11.2, 3.8), 130.2, 129.9, 119.5 (dd, *J* = 9.8, 2.8, 1H), 112.4 (dd, *J* = 19.9, 15.6), 111.5 (dd, *J* = 23.4, 4.4), 70.6 (d, *J* = 1.4), 53.1 (d, *J* = 2.3); IR 1732, 1251, 728 cm<sup>-1</sup>; R<sub>f</sub> 0.814 in 50% EtOAc/hexanes; HRMS (ESI) *m/z* calcd for C<sub>15</sub>H<sub>9</sub>ClF<sub>2</sub>N<sub>2</sub>O<sub>3</sub>S (M + H)<sup>+</sup> 371.0068, found 371.0058.

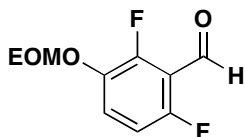

**3-Ethoxymethoxy-2,6-difluoro-3-hydroxy-benzaldehyde (13).** A solution of **9** (0.945 g, 5.02 mmol) in 30 mL dry THF was cooled to  $-78\text{ }^{\circ}\text{C}$ . To this solution, *n*-BuLi (2.2 mL, 5.50 mmol, 2.5M in hexanes) was added dropwise at  $-78\text{ }^{\circ}\text{C}$ . After the reaction had stirred for 30 min at  $-78\text{ }^{\circ}\text{C}$ , dry DMF (8.00 mL, 10.0 mmol) was added dropwise and stirred for an additional 30 min at  $-78\text{ }^{\circ}\text{C}$ . The reaction mixture was warmed to  $0\text{ }^{\circ}\text{C}$  and stirred for an additional 30 min. Water was added to the solution and extracted 3x with diethyl ether. The organic layers were combined and dried over  $\text{MgSO}_4$ . The solvent was evaporated *in vacuo* and the crude mixture was purified by flash chromatography (10 to 30% EtOAc/hexanes) yielding a yellow oil (0.619 g, 57%):  $^1\text{H}$  NMR (400 MHz,  $\text{CDCl}_3$ )  $\delta$  10.35 (s, 1H), 7.46 (td,  $J = 9.1, 5.3$  Hz, 1H), 6.92 (t,  $J = 9.5$  Hz, 1H), 5.25 (s, 2H), 3.79 (q,  $J = 7.1$  Hz, 2H), 1.24 (t,  $J = 7.1$  Hz, 3H);  $^{13}\text{C}$  NMR (151 MHz,  $\text{CDCl}_3$ )  $\delta$  185.4 – 183.7 (m), 157.4 (dd,  $J = 257.2, 4.5$  Hz), 153.5 (dd,  $J = 264.0, 6.0$  Hz), 142.2 (dd,  $J = 10.3, 3.8$  Hz), 124.6 (dd,  $J = 10.4, 3.8$  Hz), 114.8 (dd,  $J = 12.1, 8.7$  Hz), 111.7 (dd,  $J = 22.2, 4.5$  Hz), 95.1, 65.0, 15.1; IR (neat) 3433, 1687  $\text{cm}^{-1}$ ;  $R_f$  0.689 in 30% EtOAc/hexanes; HRMS (ESI)  $m/z$  calcd for  $\text{C}_{10}\text{H}_{10}\text{F}_2\text{O}_3$  (M - EOM) $^-$  157.0101, found 157.0115.

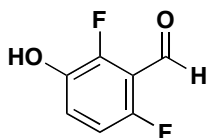

**2,6-Difluoro-3-hydroxy-benzaldehyde (3).** The EOM-protected aldehyde **13** (0.564 g, 2.61 mmol) was dissolved in a 50:50 mixture of 6M HCl and MeOH (~30 mL total volume). After 1 h, the solvent was evaporated *in vacuo* yielding a white solid (0.380 g, 92%):  $^1\text{H}$  NMR (300 MHz,  $\text{CDCl}_3$ )  $\delta$  10.33 (s, 1H), 7.30-7.22 (m, 1H), 6.96-6.89 (m, 1H), 5.53 (brs, 1H);  $^{13}\text{C}$  NMR (101 MHz,  $\text{CDCl}_3$ )  $\delta$  185.2, 156.8 (dd,  $J = 255.2, 4.6$  Hz), 150.1 (d,  $J = 255.8$  Hz), 140.8 (dd,  $J = 13.3, 3.5$  Hz), 123.8, 114.6 – 113.3 (m), 112.3 (dd,  $J = 22.6, 4.3$  Hz); IR (neat) 3179, 1675  $\text{cm}^{-1}$ ;  $R_f$  0.703 in 50% EtOAc/hexanes ; HRMS (ESI)  $m/z$  calcd for  $\text{C}_7\text{H}_4\text{F}_2\text{O}_2$  (M - H) $^-$  157.0101, found 157.0115.

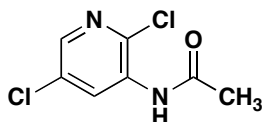

**N-(2,5-Dichloro-pyridin-3-yl)-acetamide (14).** 3-amino-2,5-dichloropyridine (0.316 g, 1.94 mmol) was dissolved in  $\text{CH}_2\text{Cl}_2$  (30 mL). The mixture was cooled to 0 °C and acetyl chloride (0.275 mL, 3.87 mmol) was added dropwise. This was followed by the addition of (*i*-Pr)<sub>2</sub>NEt. (0.70 mL, 4.08 mmol). After 3 h, the solvent was evaporated *in vacuo* and the crude mixture was purified by flash chromatography (100%  $\text{CH}_2\text{Cl}_2$ ) yielding a white solid (0.265 g, 65%): mp 120-121 °C; <sup>1</sup>H NMR (400 MHz,  $\text{CDCl}_3$ )  $\delta$  8.84 (d, *J* = 2.4 Hz, 1H), 8.08 (d, *J* = 2.4 Hz, 1H), 7.64 (brs, 1H), 2.31 (s, 3H); <sup>13</sup>C NMR (101 MHz,  $\text{CDCl}_3$ )  $\delta$  168.8, 142.2, 137.2, 132.3, 131.7, 128.36, 25.1; IR (neat) 3270, 1652, 1507  $\text{cm}^{-1}$ ; *R<sub>f</sub>* 0.666 in 50% EtOAc/hexanes; HRMS (ESI) *m* / *z* calcd for  $\text{C}_7\text{H}_6\text{Cl}_2\text{N}_2\text{O}$  (*M* + *H*)<sup>+</sup> 204.9935, found 204.9922.

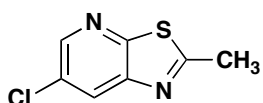

**6-Chloro-2-methyl-thiazolo[5,4-b]pyridine (15).** Compound **14** (0.227 g, 1.12 mmol) was dissolved in dry toluene (20 mL) followed by the addition of phosphorus pentasulfide (0.369 g, 1.66 mmol). The reaction mixture was stirred overnight at 110 °C. The crude mixture was passed through a plug of silica gel and washed with  $\text{CH}_2\text{Cl}_2$ . The solvent was evaporated *in vacuo* and the crude mixture was purified by flash chromatography (100%  $\text{CH}_2\text{Cl}_2$ ) yielding a white solid (0.153 g, 75%): mp 108-109 °C; <sup>1</sup>H NMR (300 MHz,  $\text{CDCl}_3$ )  $\delta$  8.49 (d, *J* = 2.1 Hz, 1H), 8.14 (d, *J* = 2.2 Hz, 1H), 2.86 (s, 3H); <sup>13</sup>C NMR (75 MHz,  $\text{CDCl}_3$ )  $\delta$  170.7, 156.9, 147.0, 145.7, 129.8, 129.0, 21.4; *R<sub>f</sub>* 0.703 in 50% EtOAc/hexanes; HRMS (ESI) *m* / *z* calcd for  $\text{C}_7\text{H}_5\text{ClN}_2\text{S}$  (*M* + *H*)<sup>+</sup> 184.9940, found 184.9929.

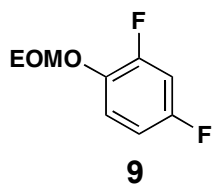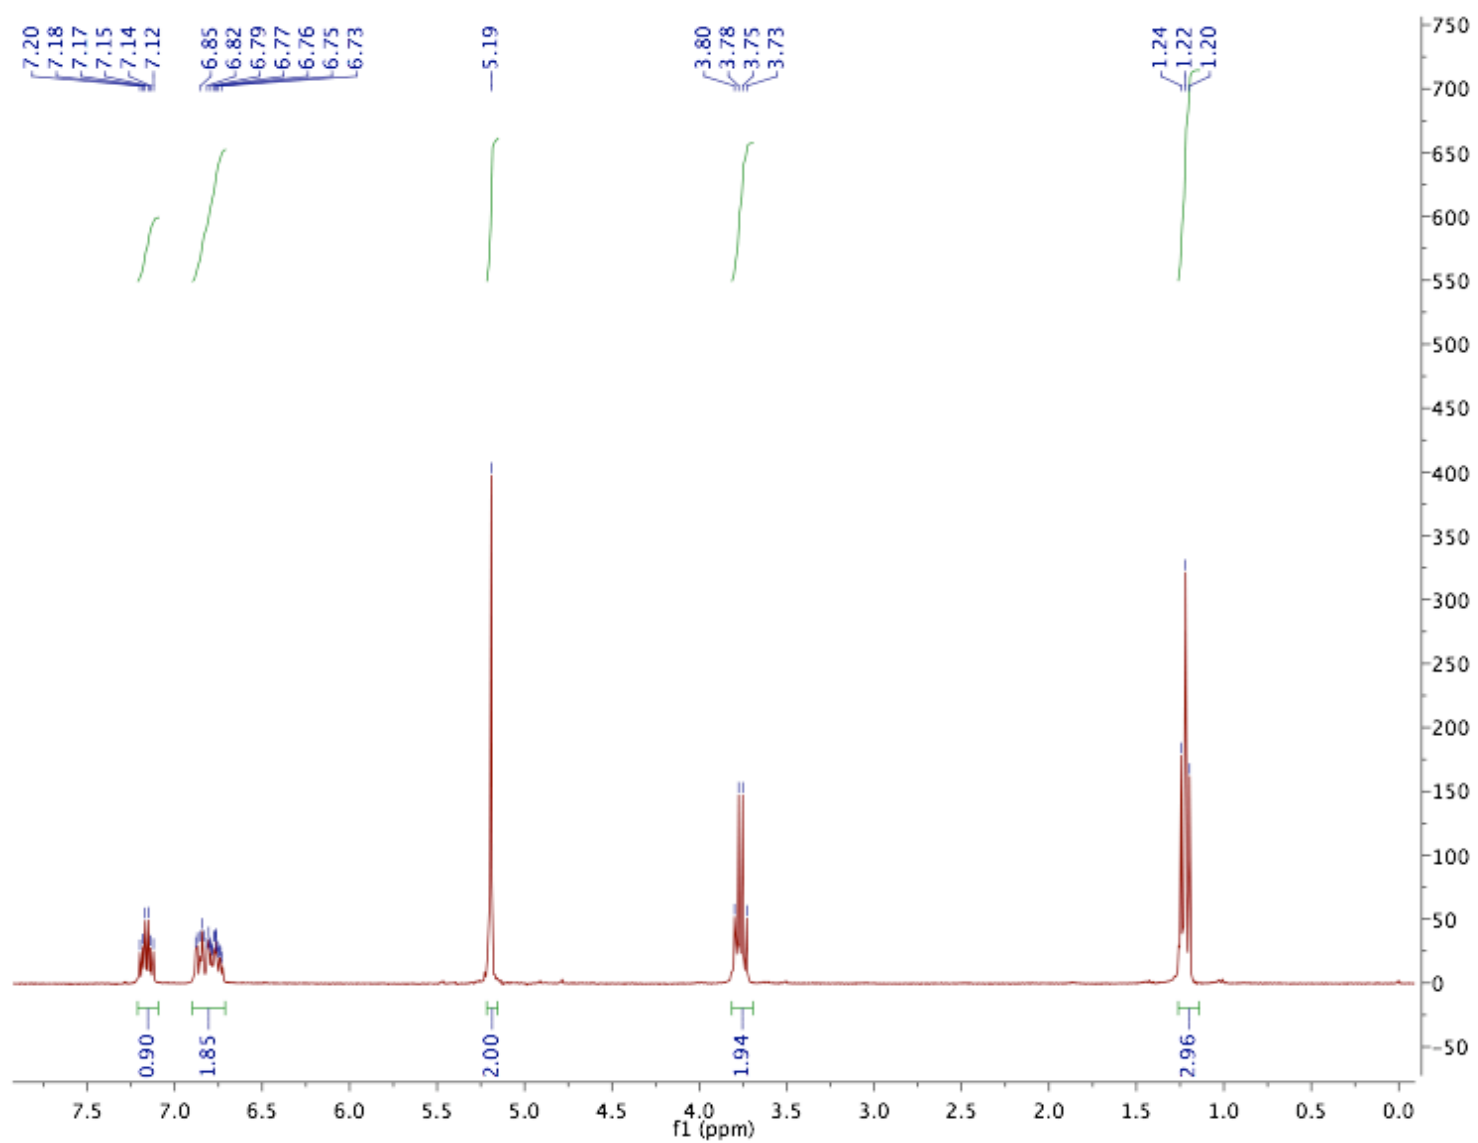

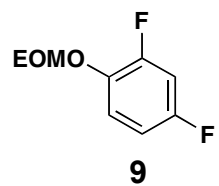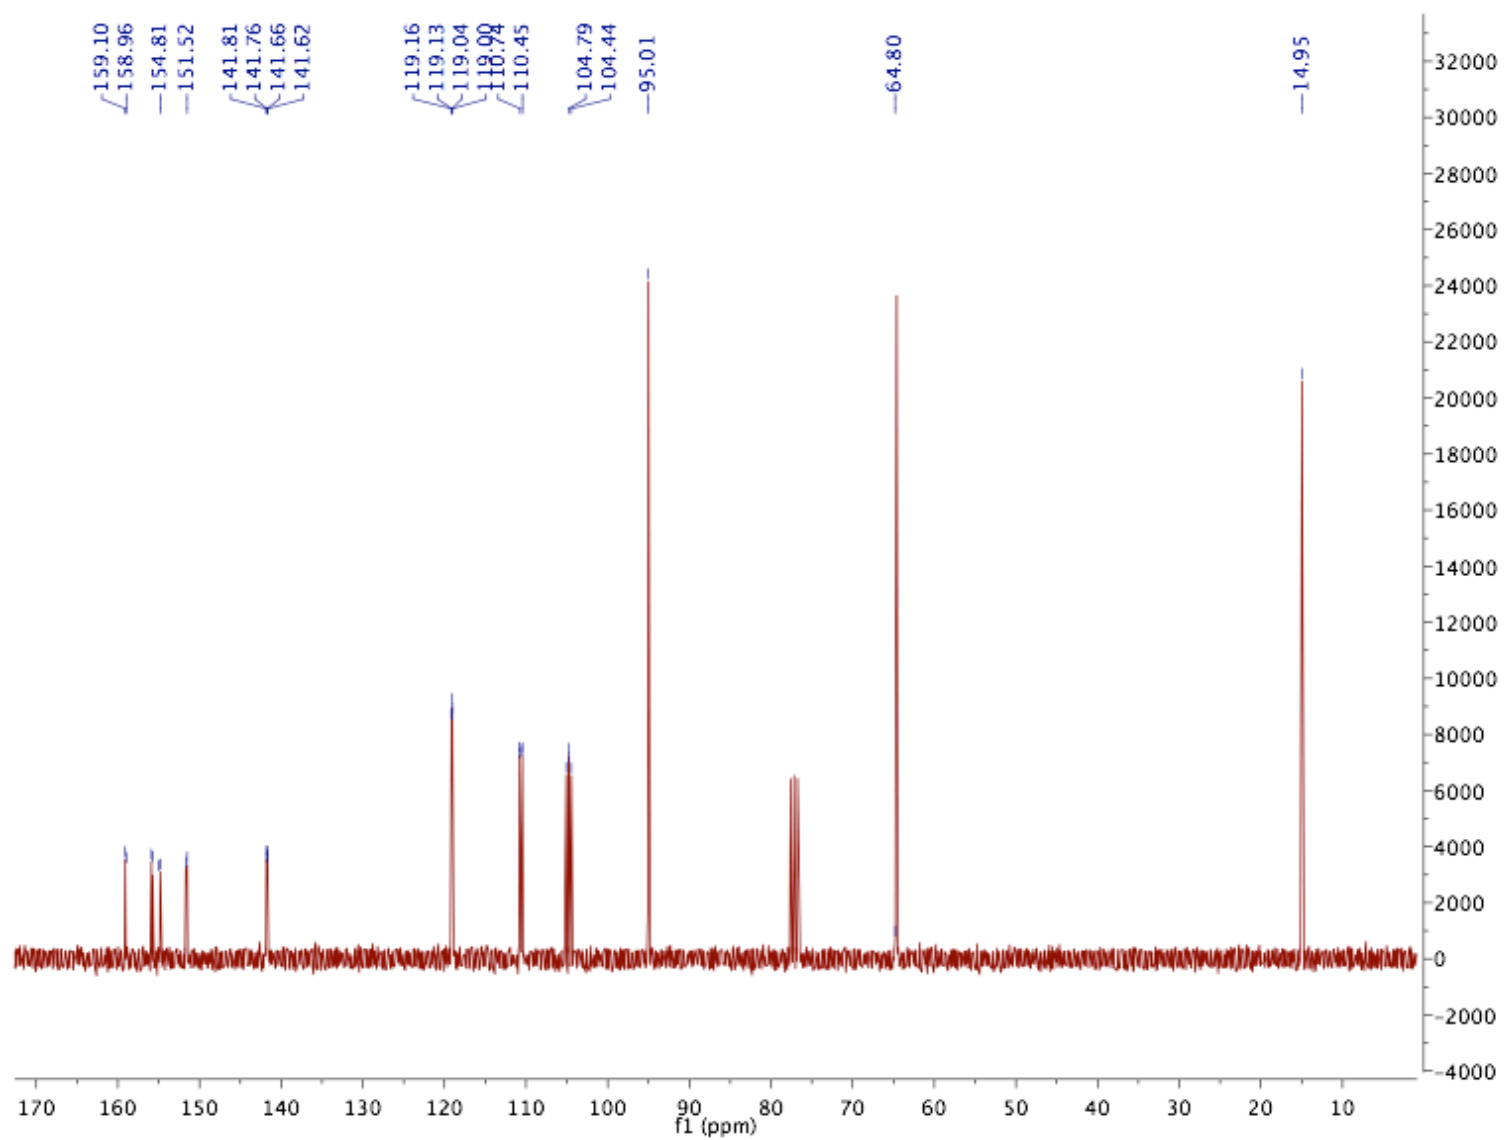

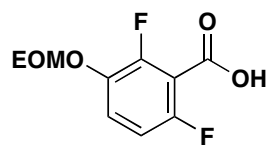

11

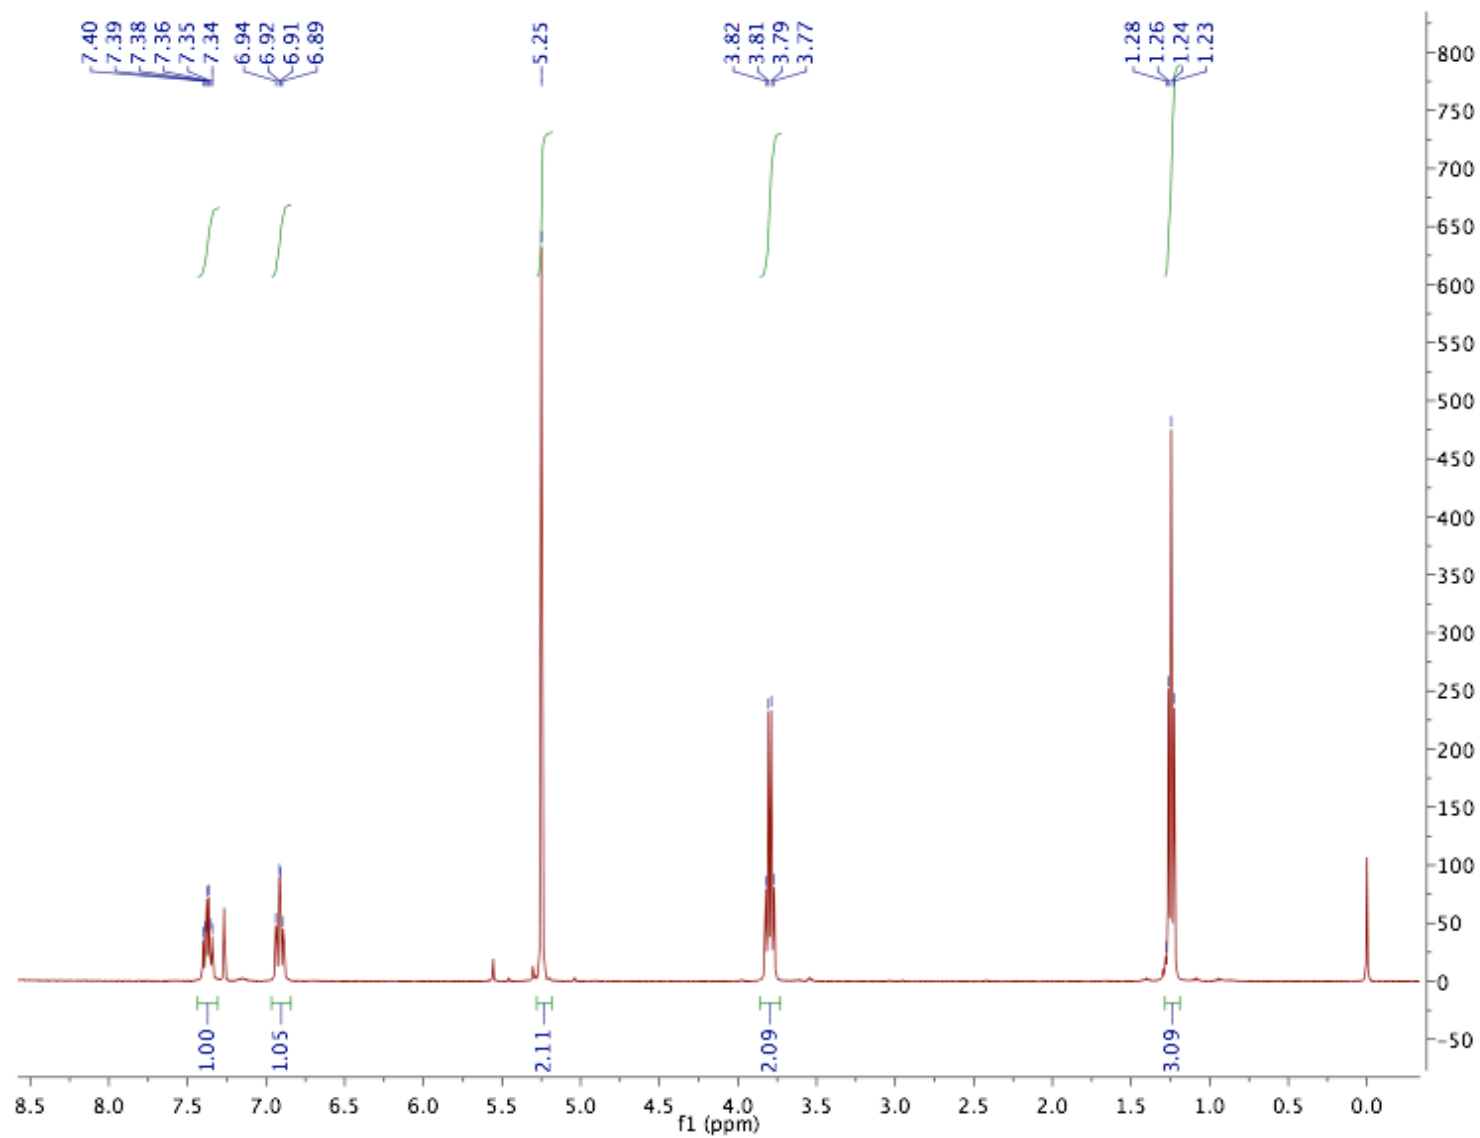

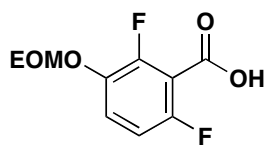

11

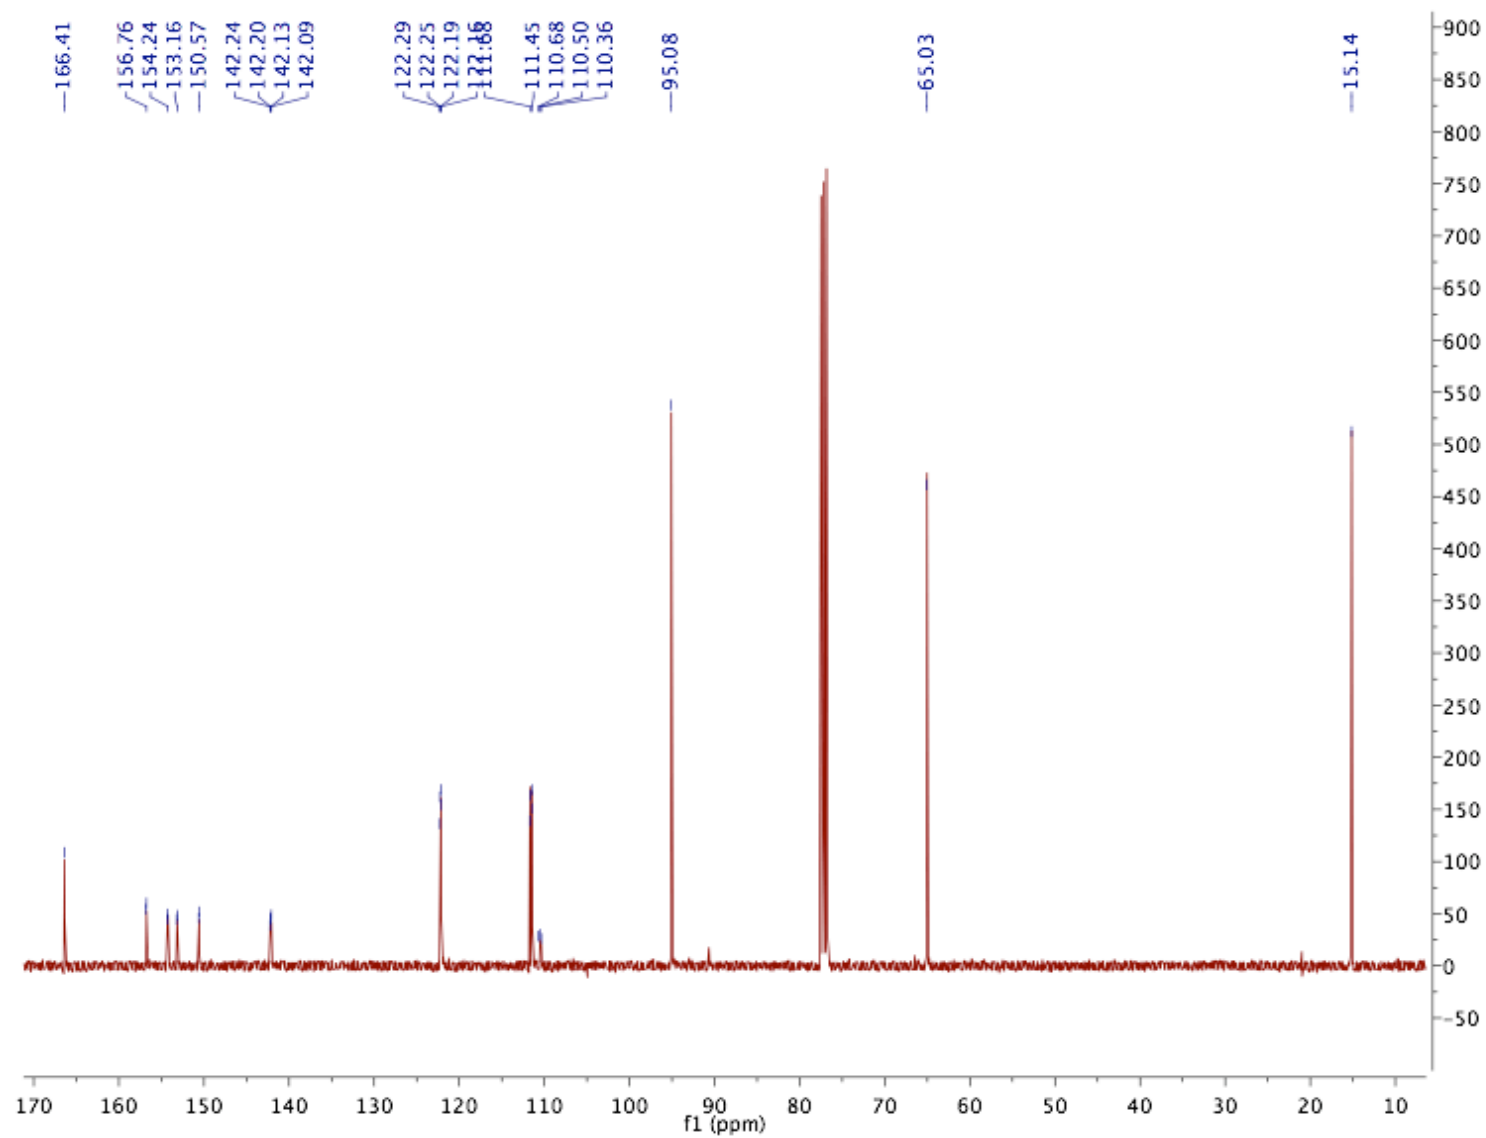



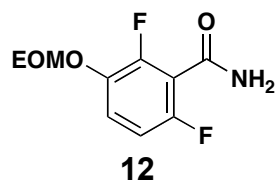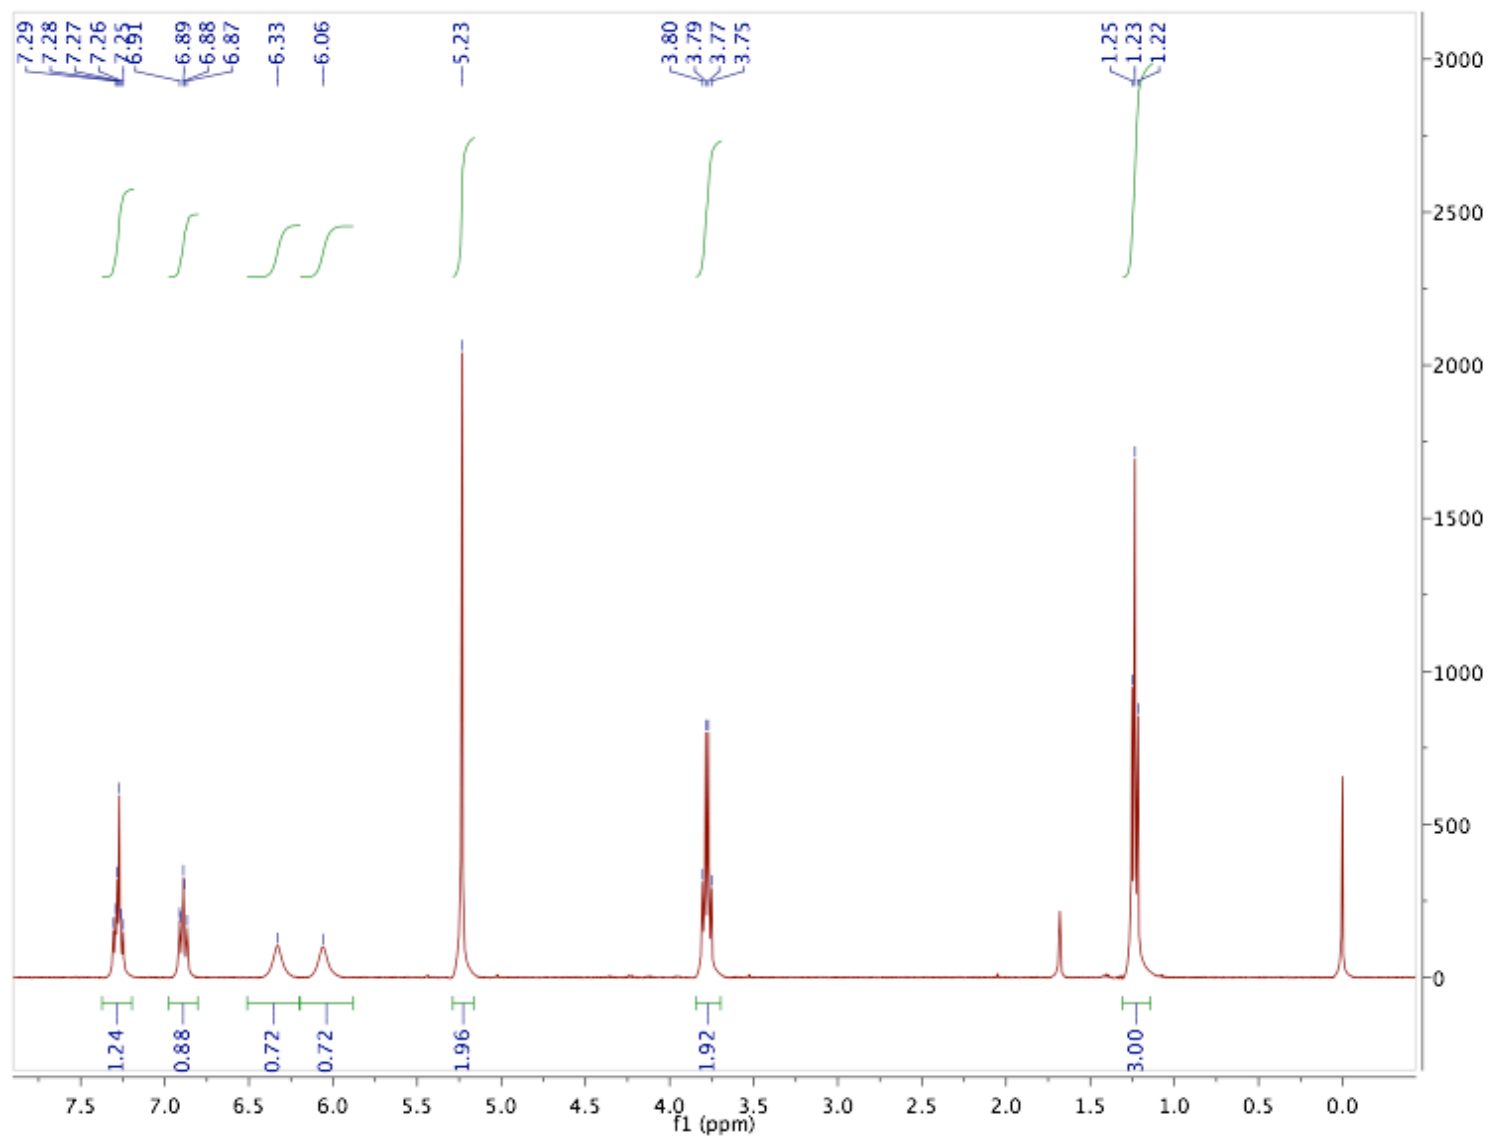

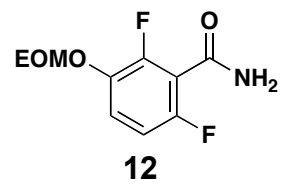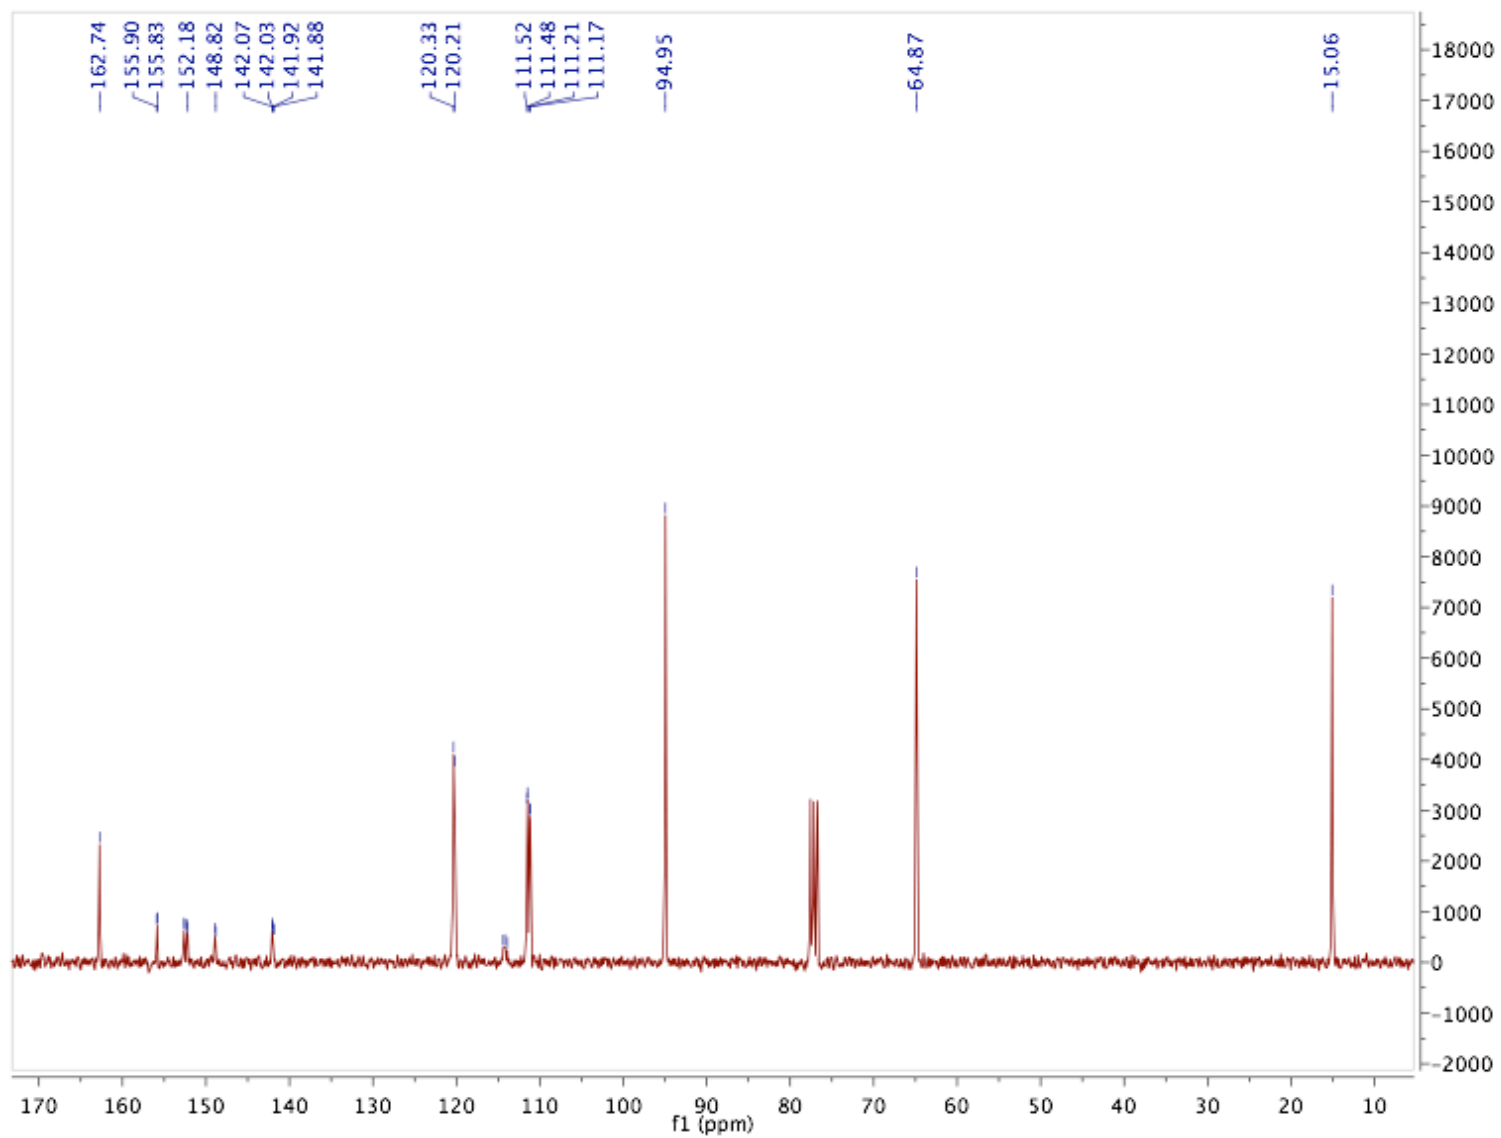

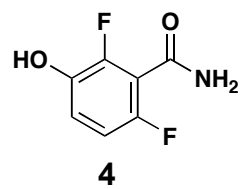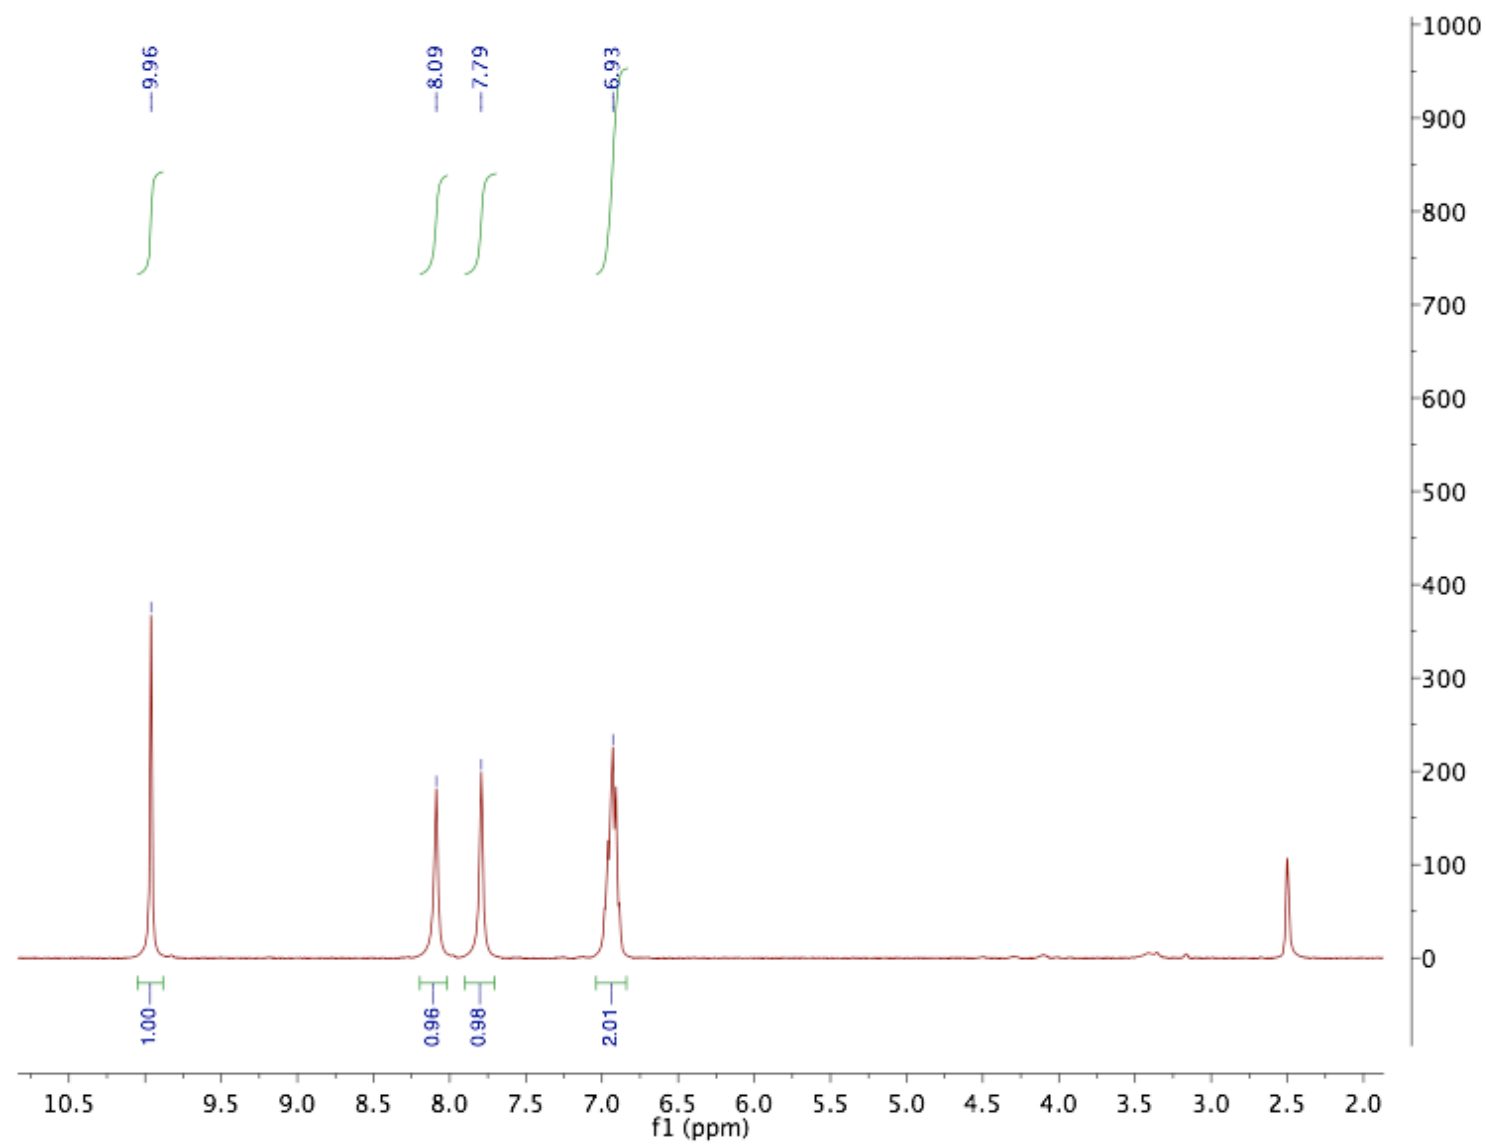

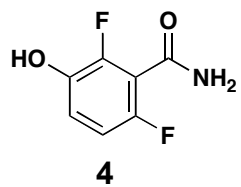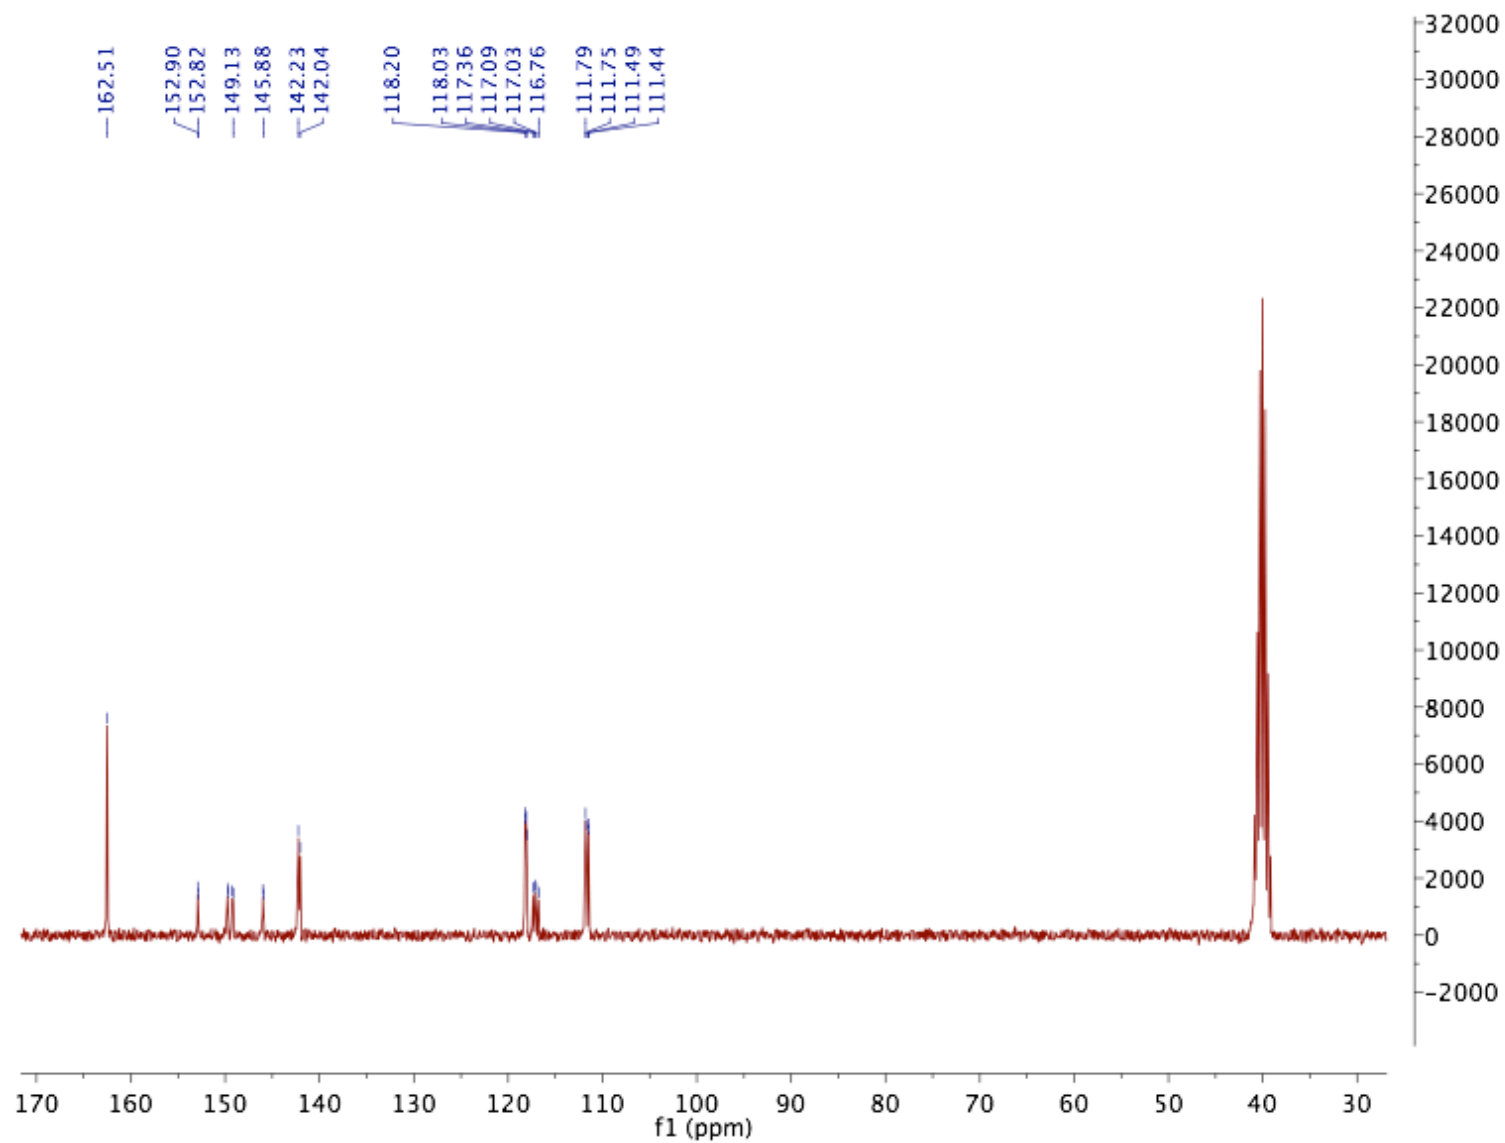

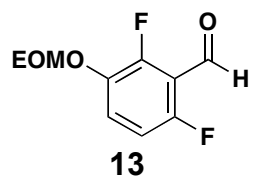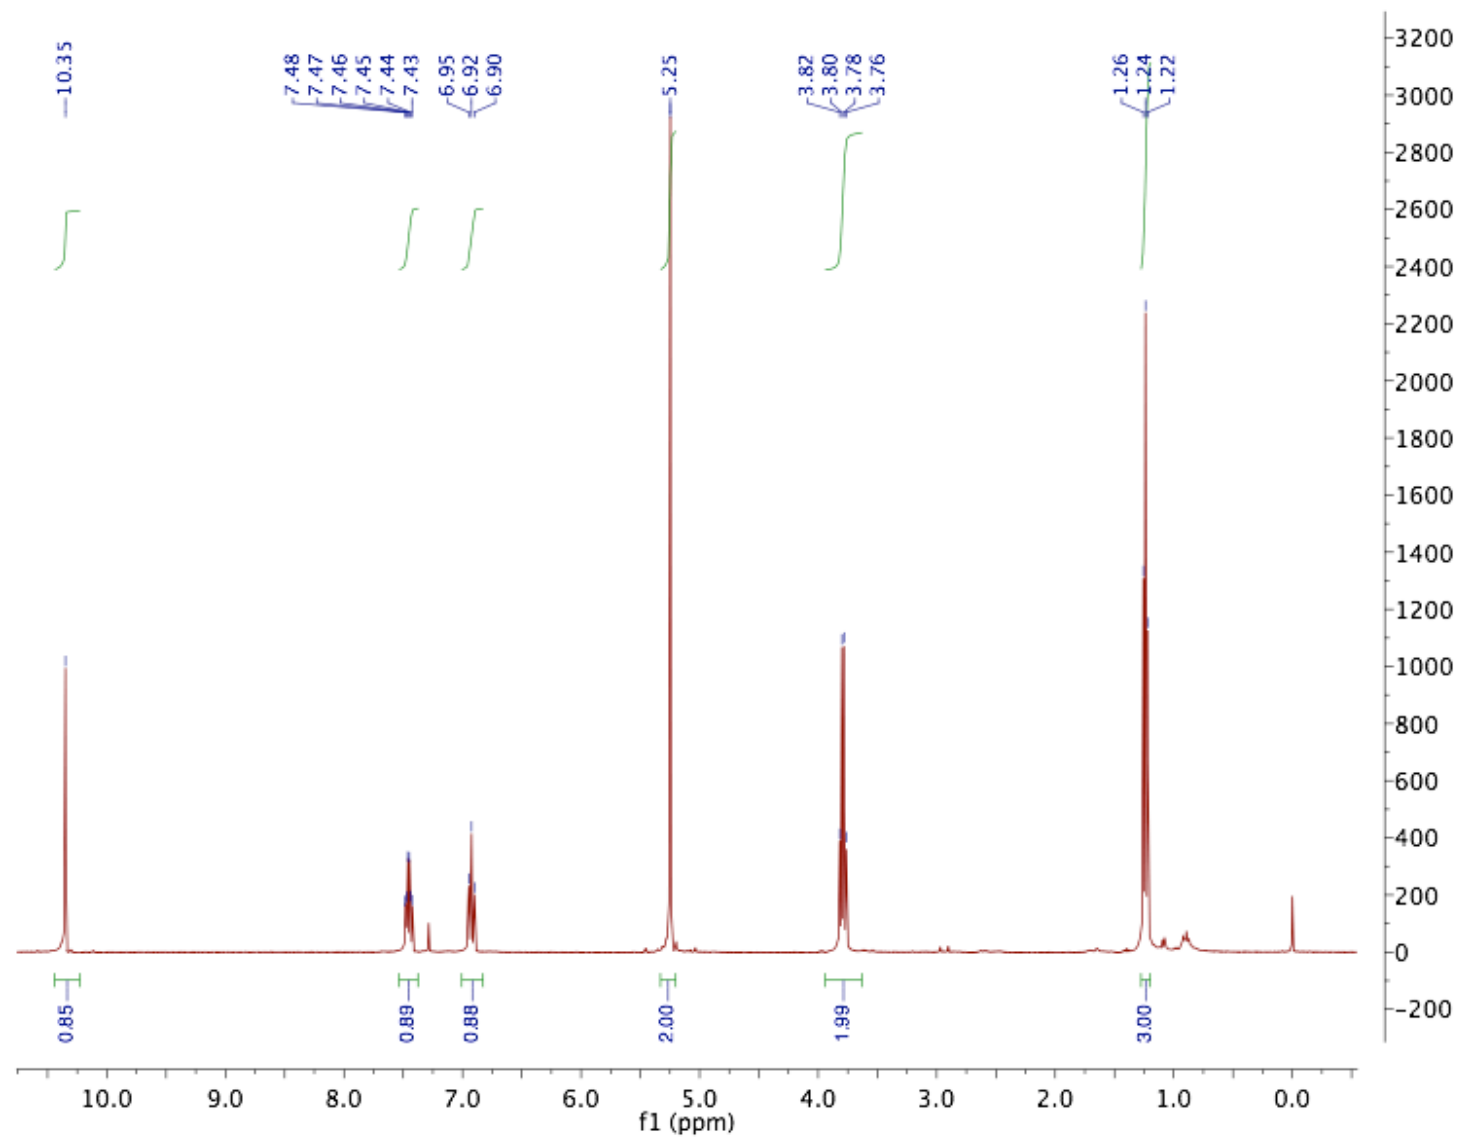

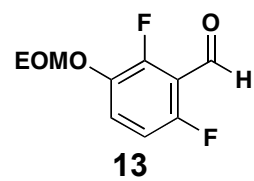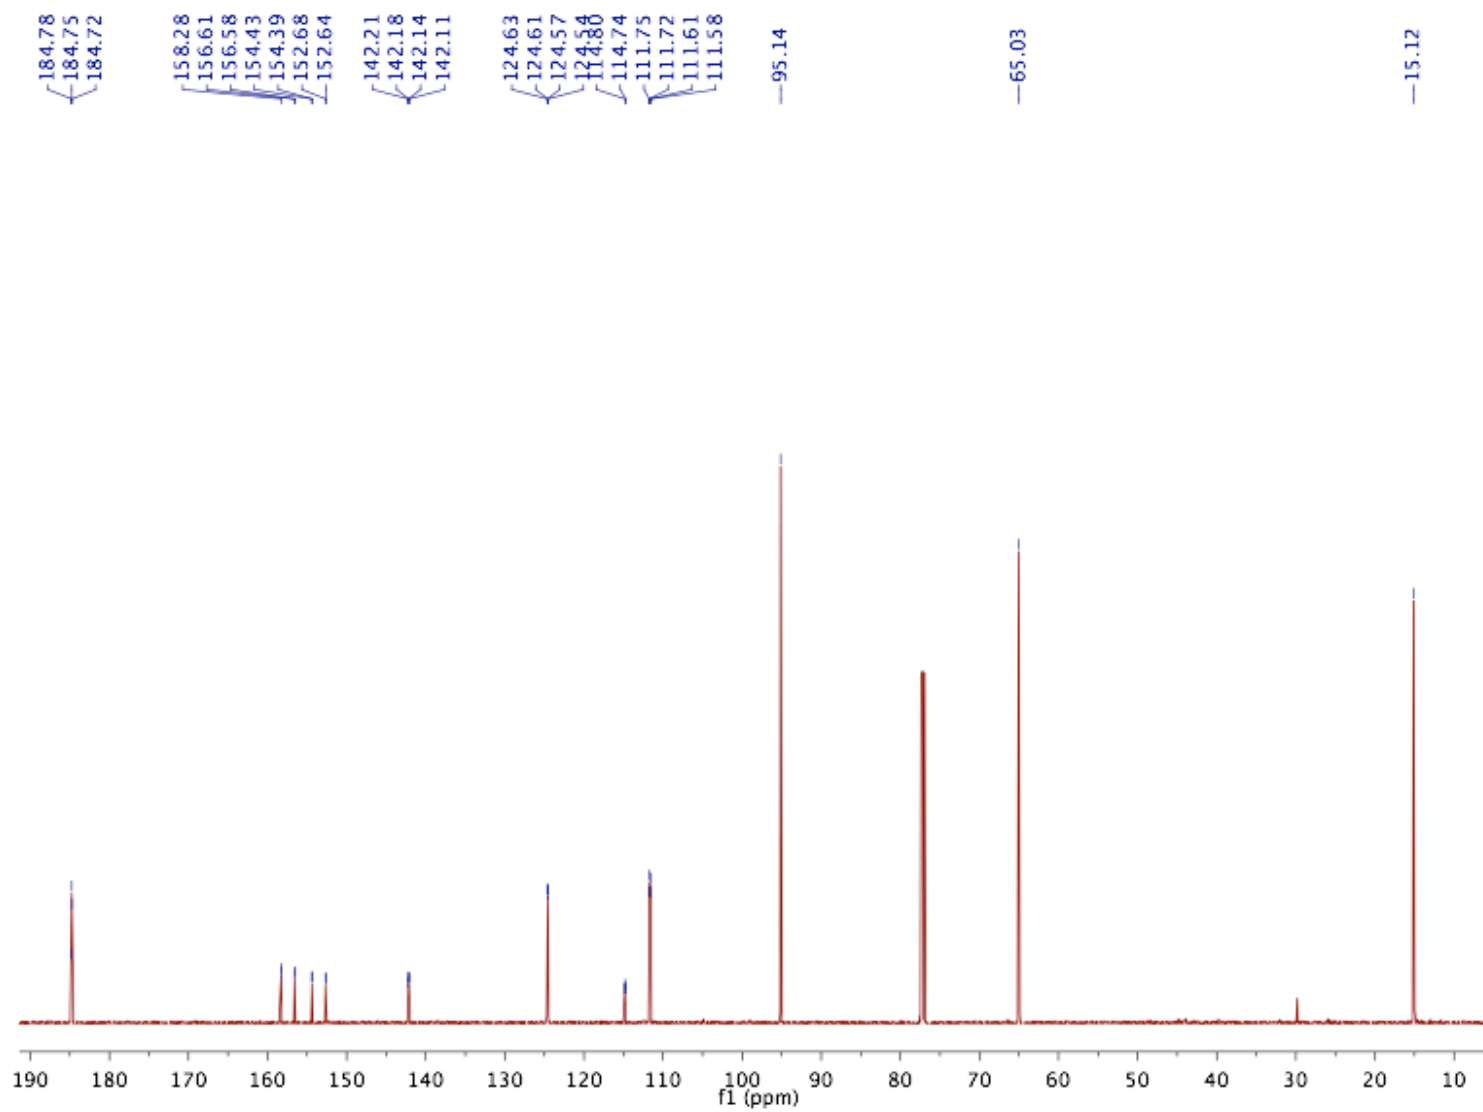

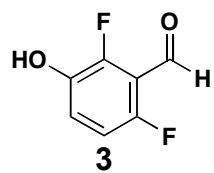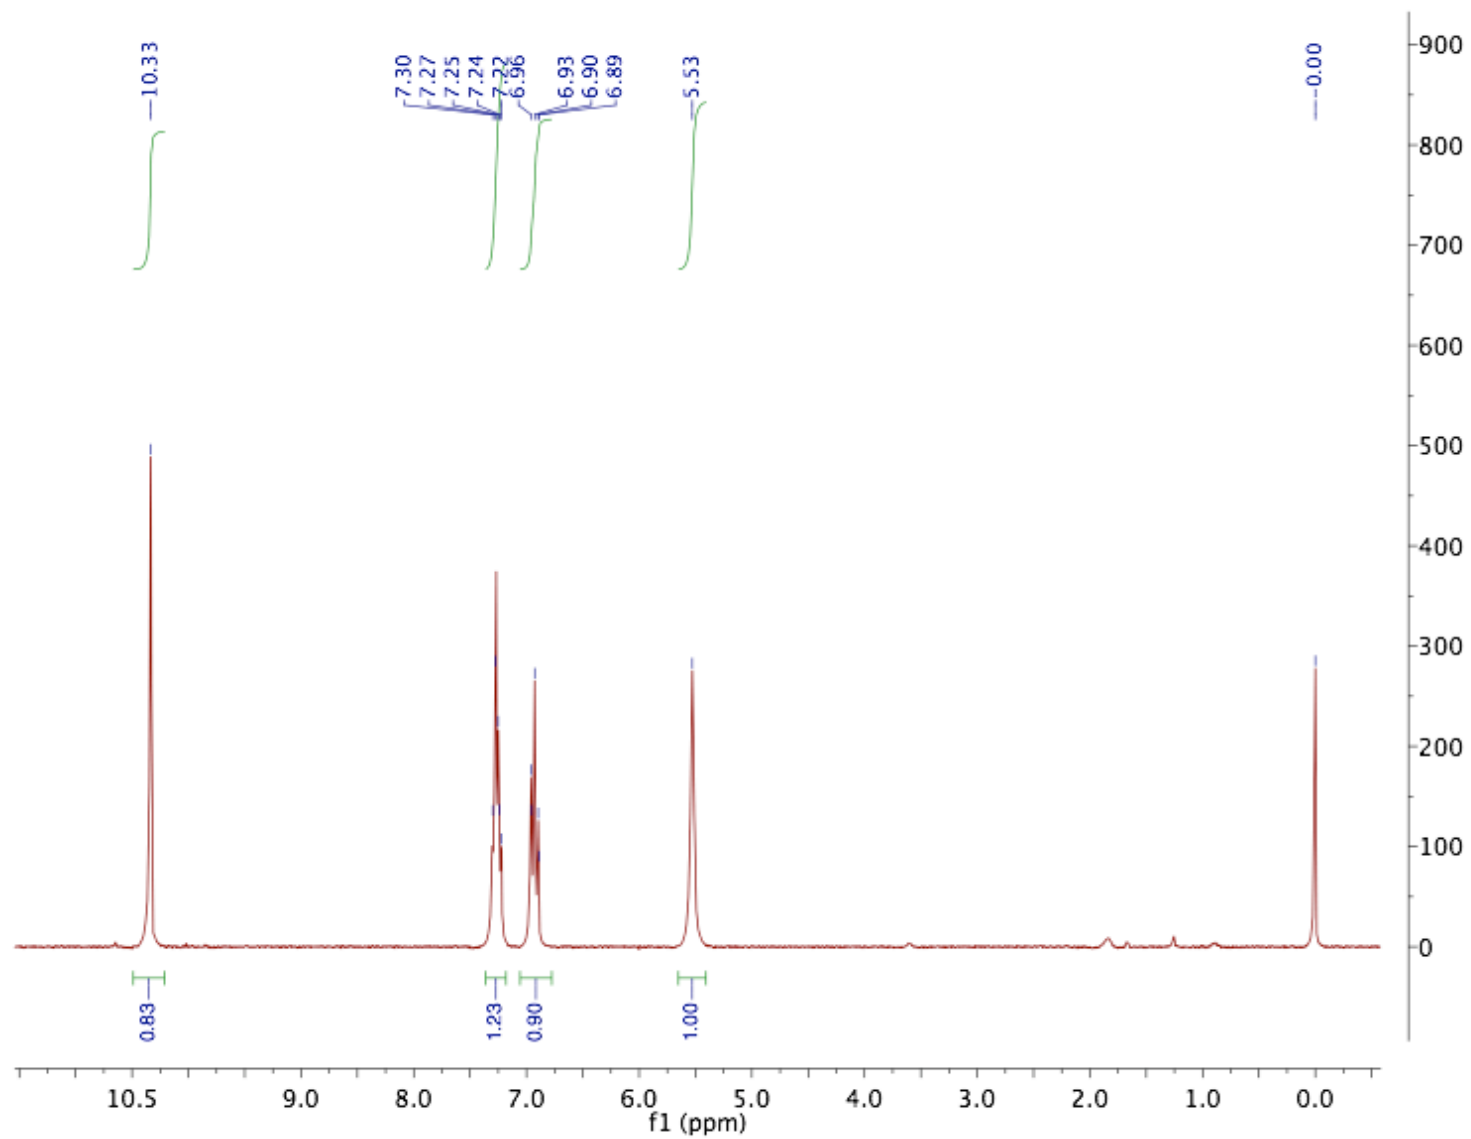

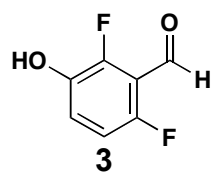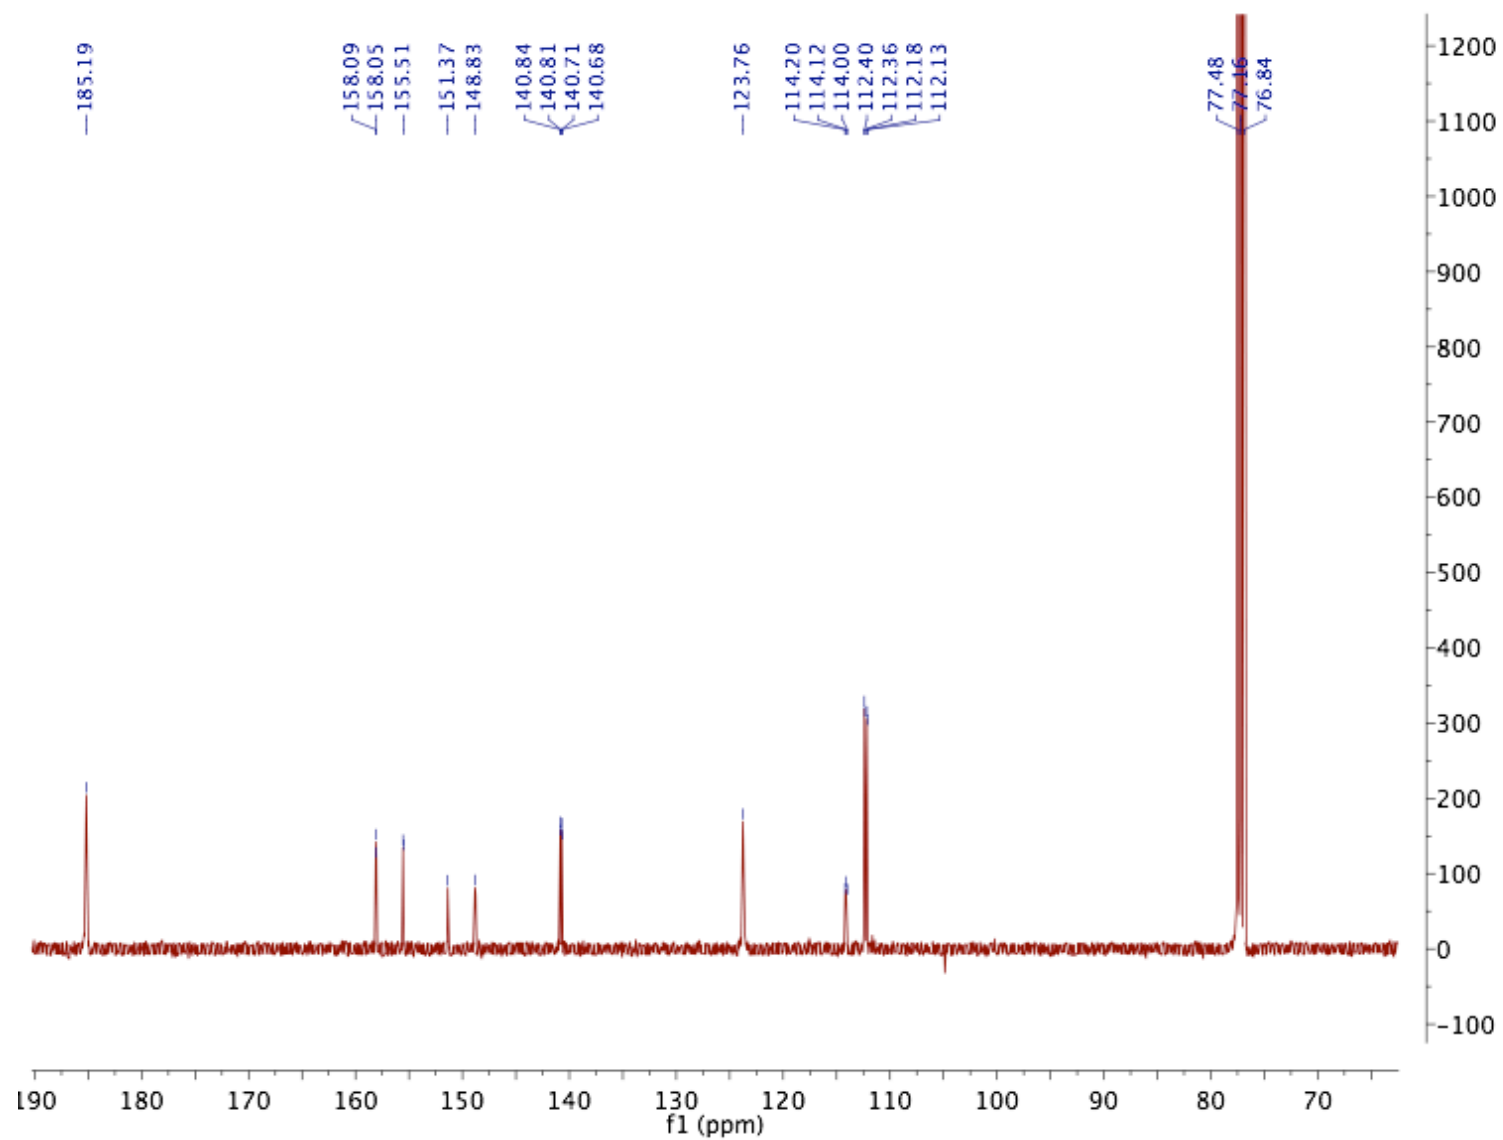



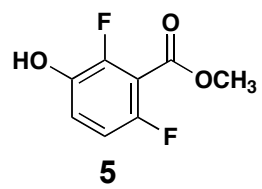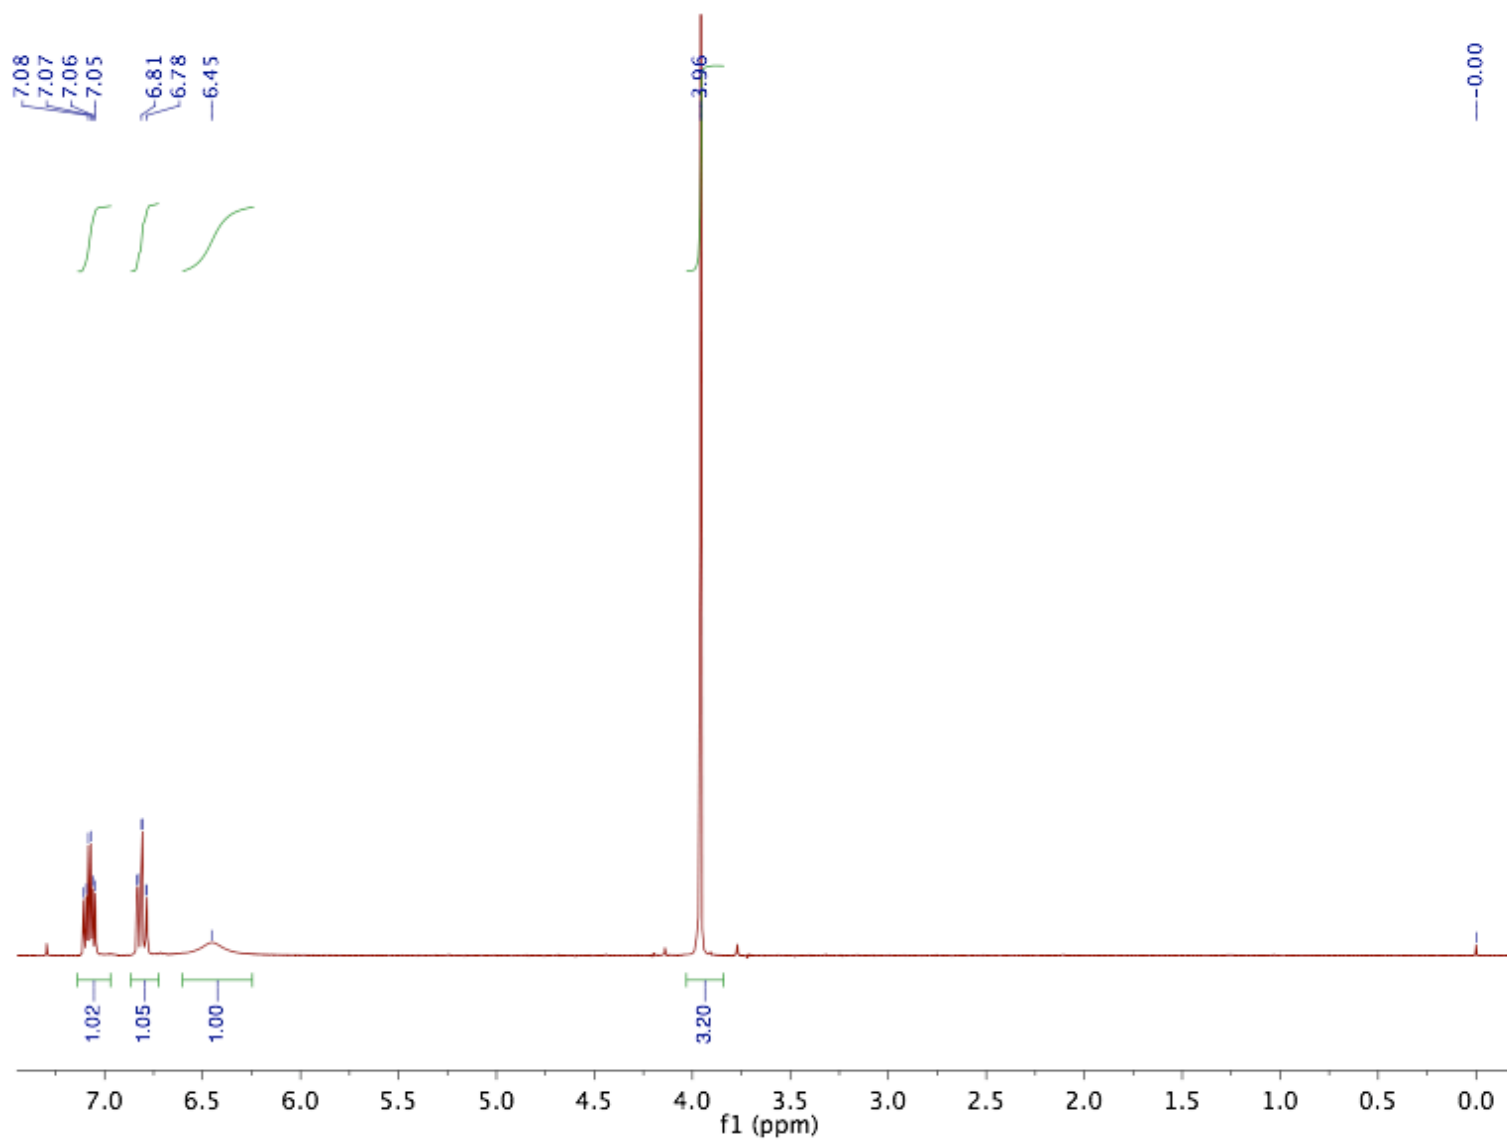

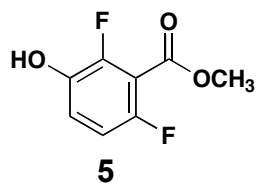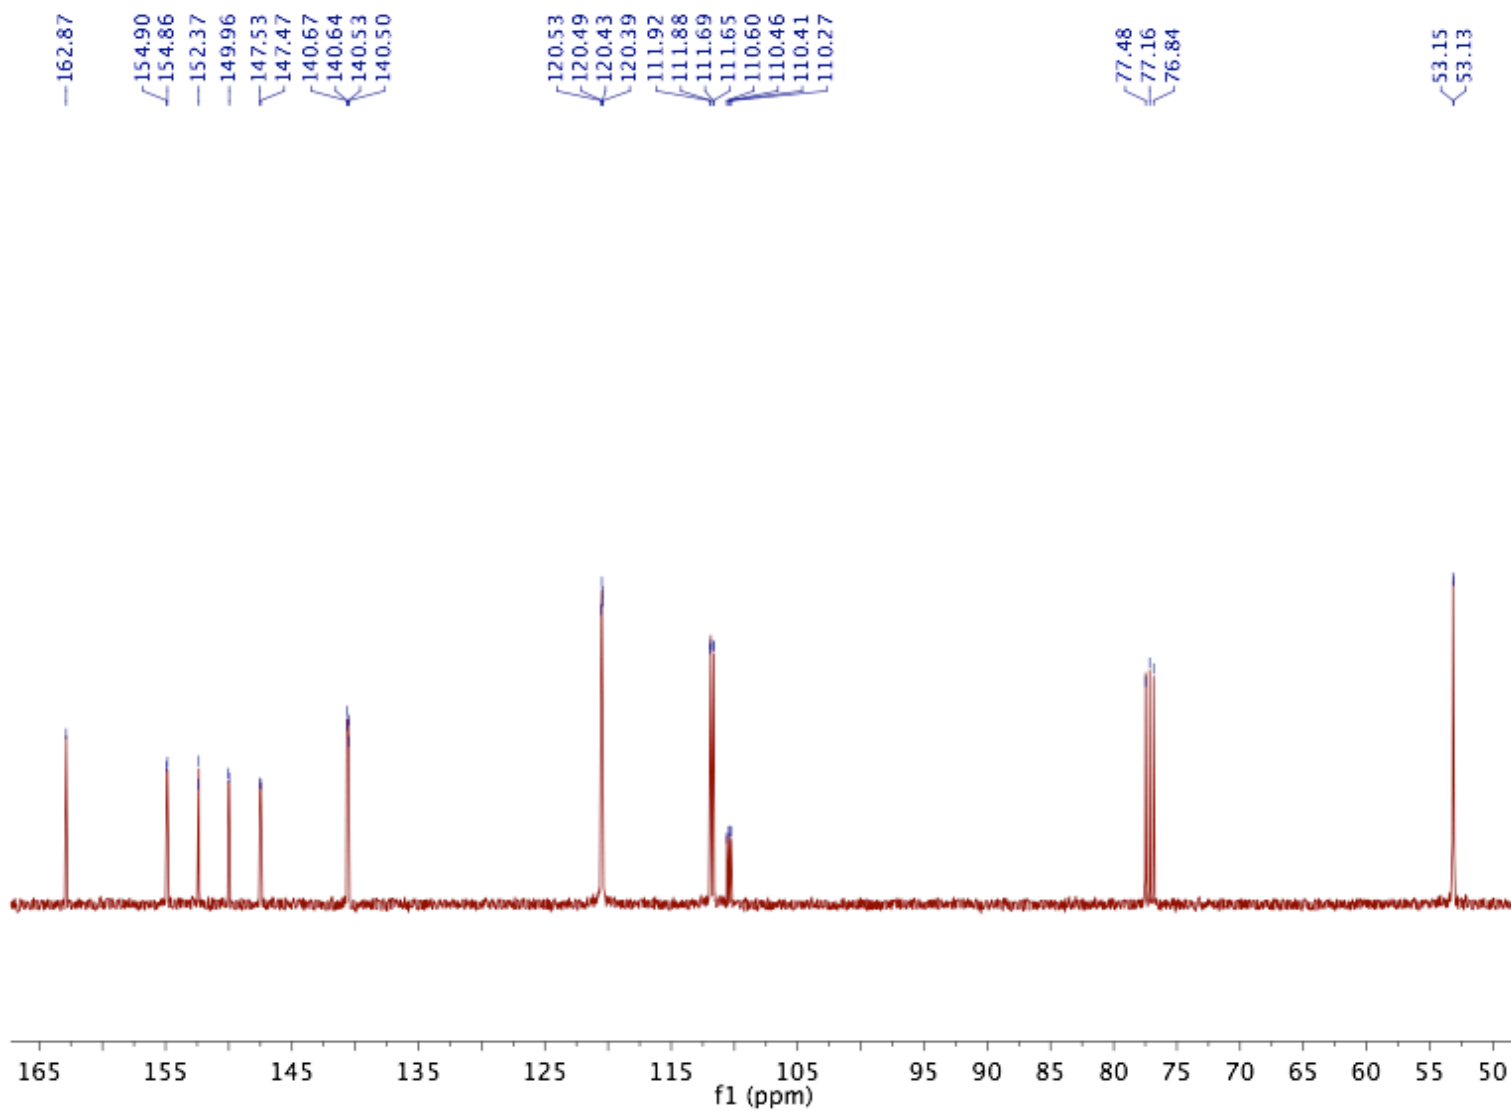

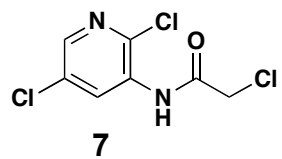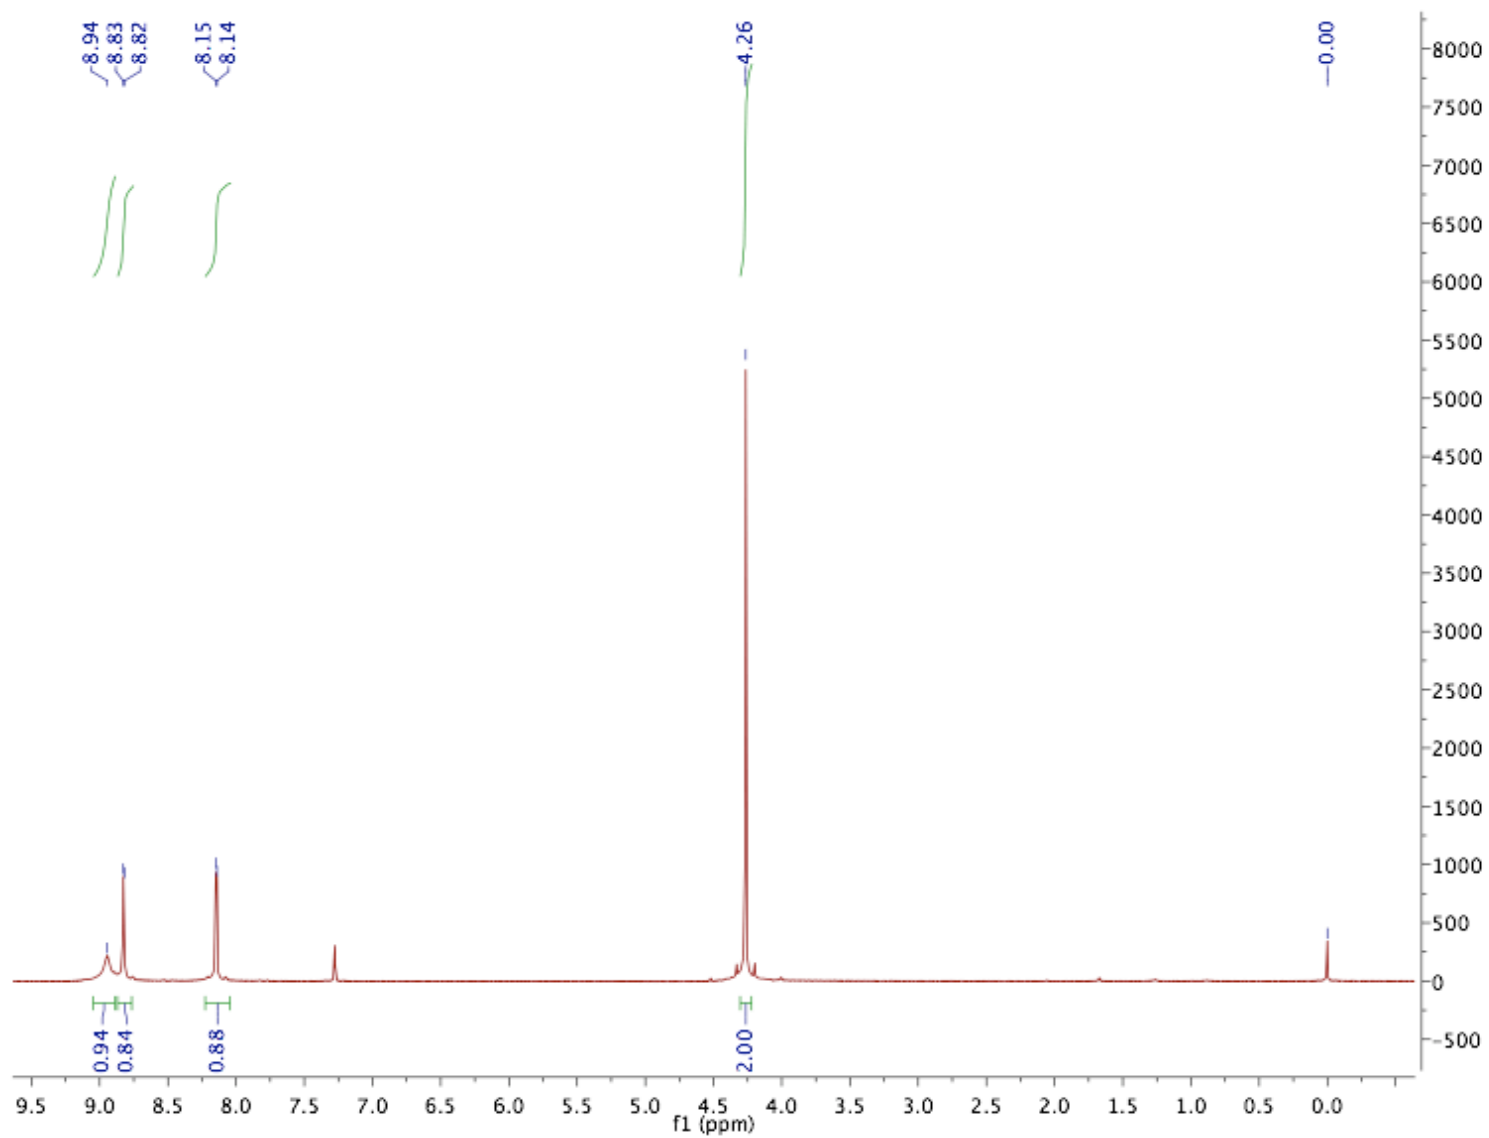

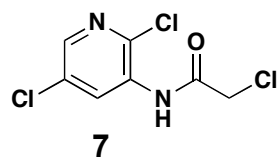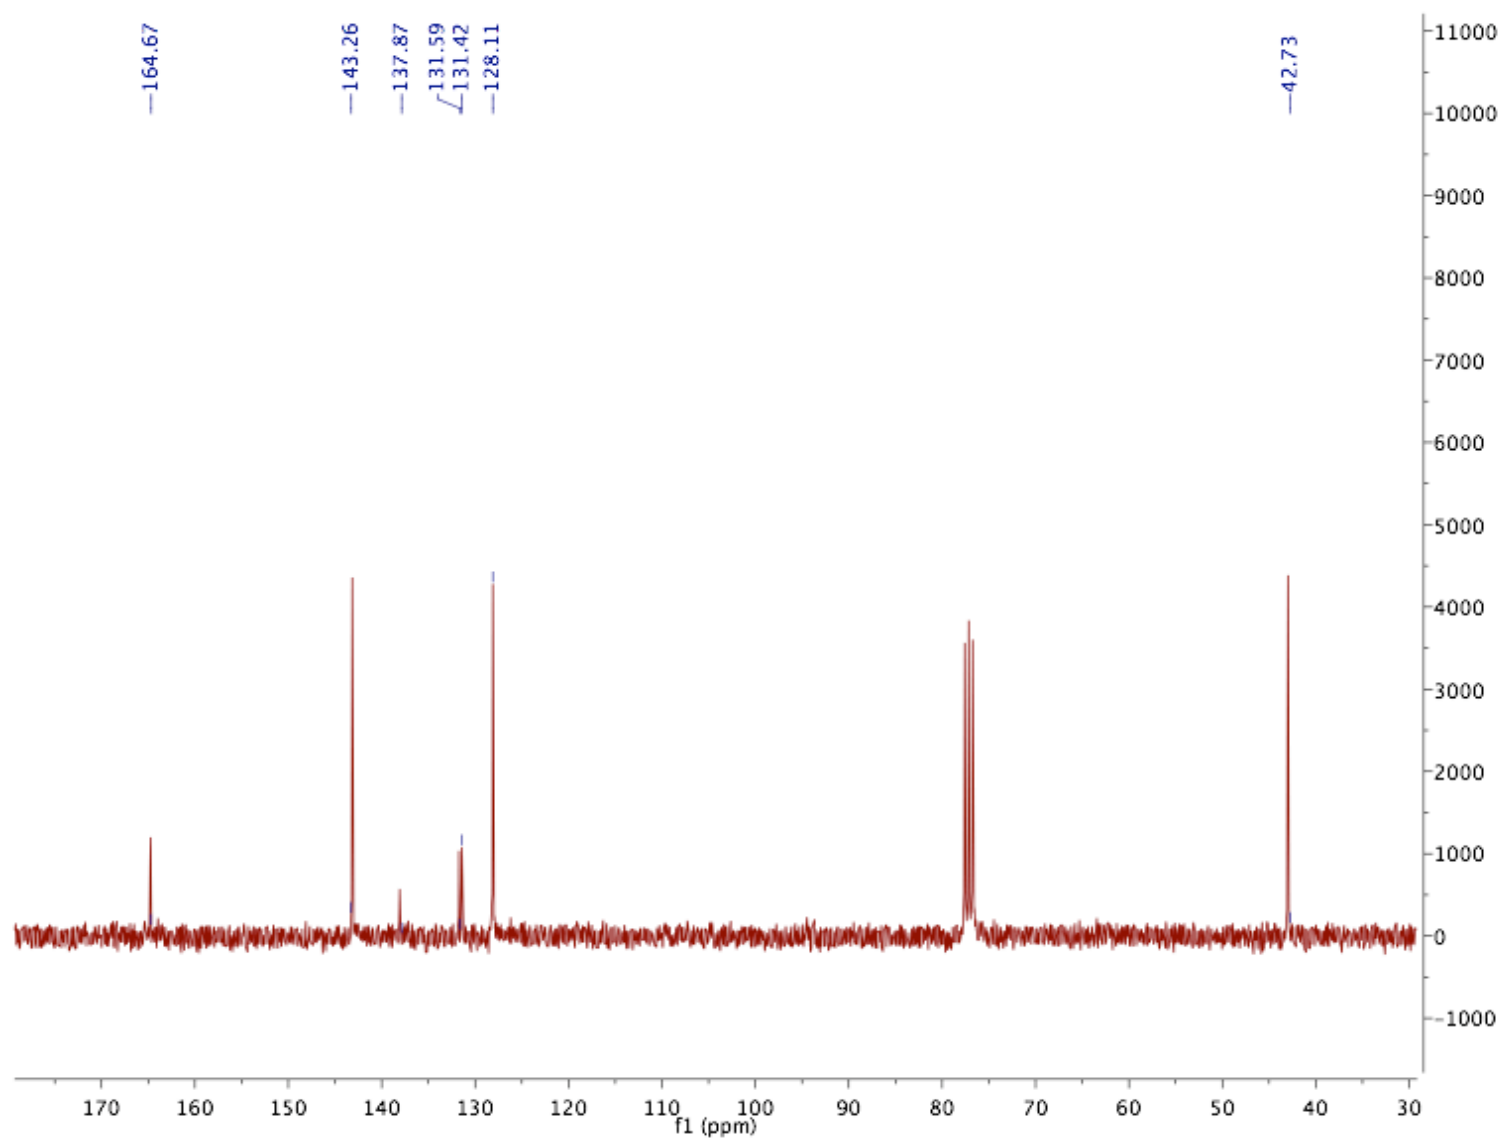

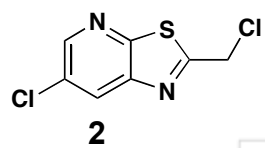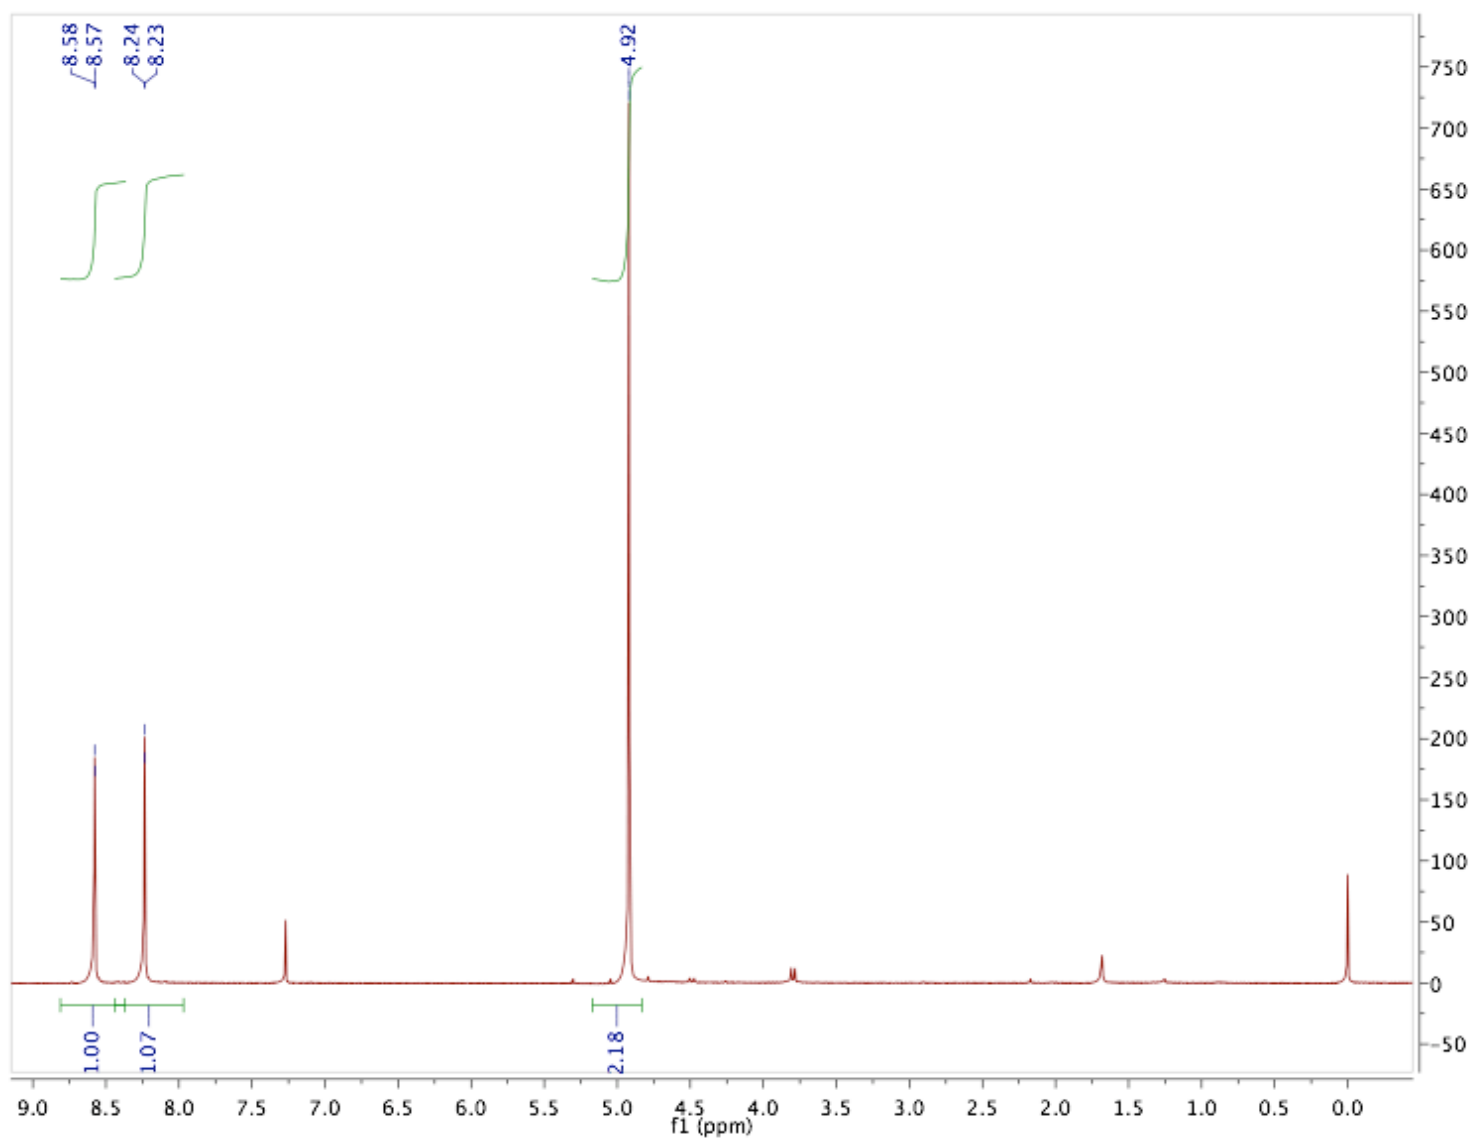

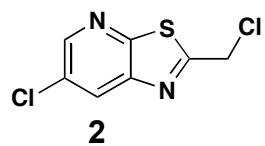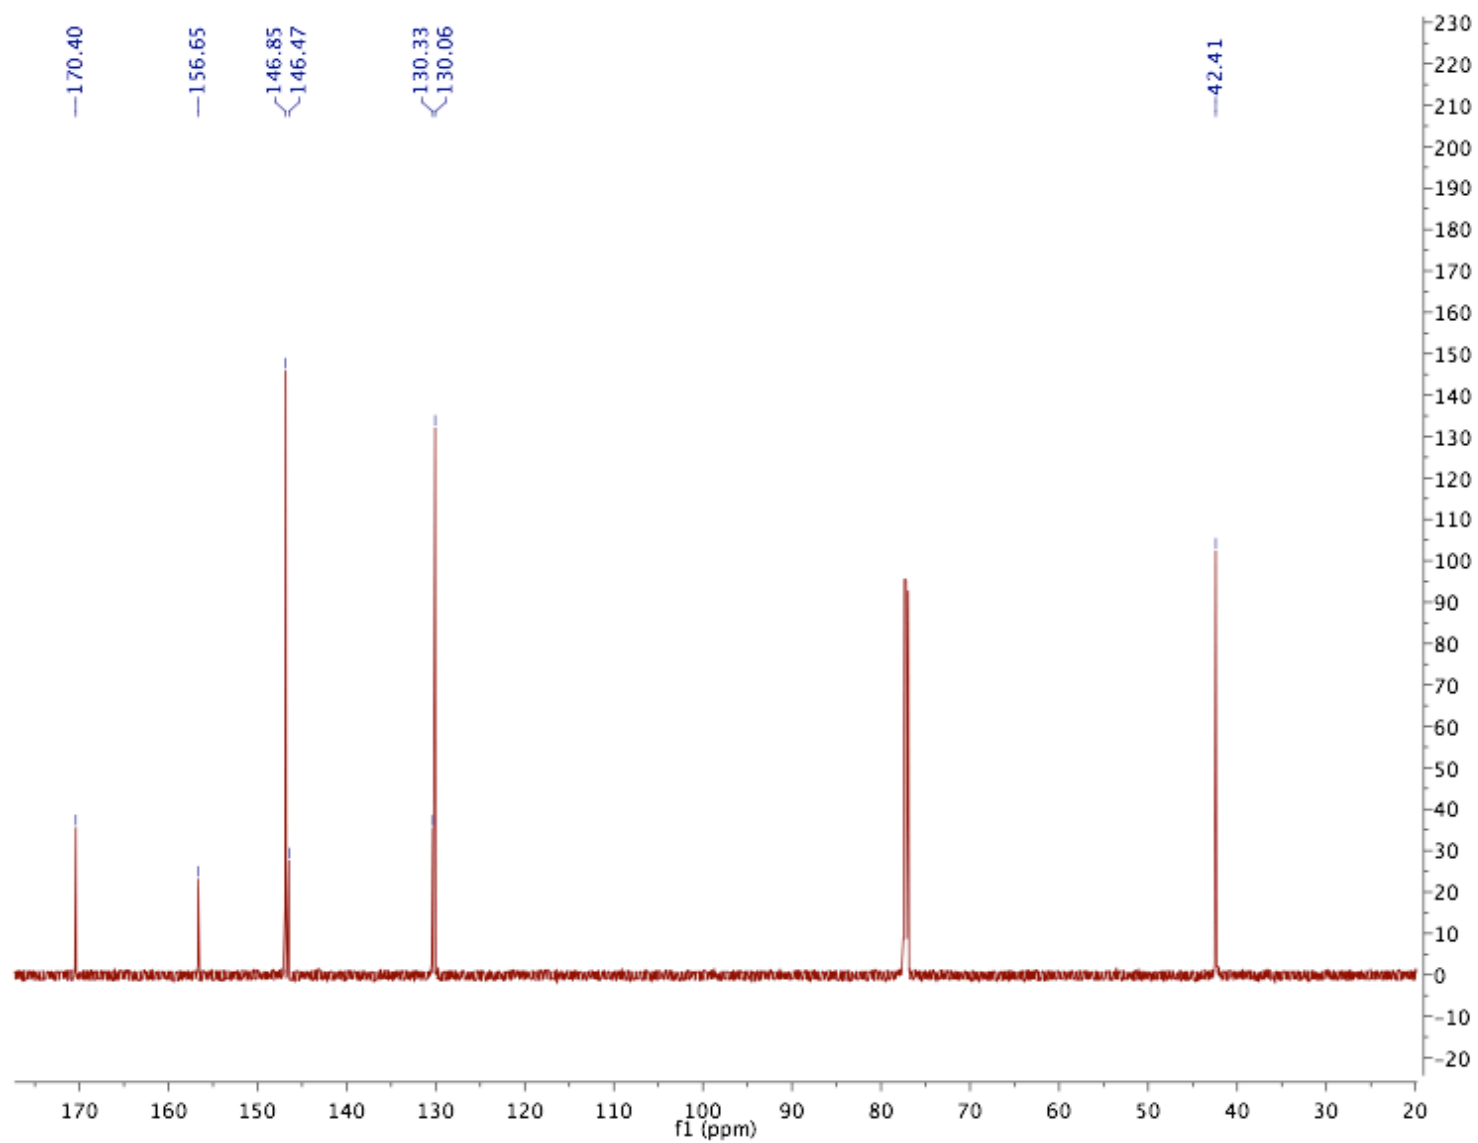

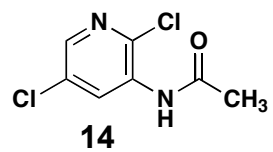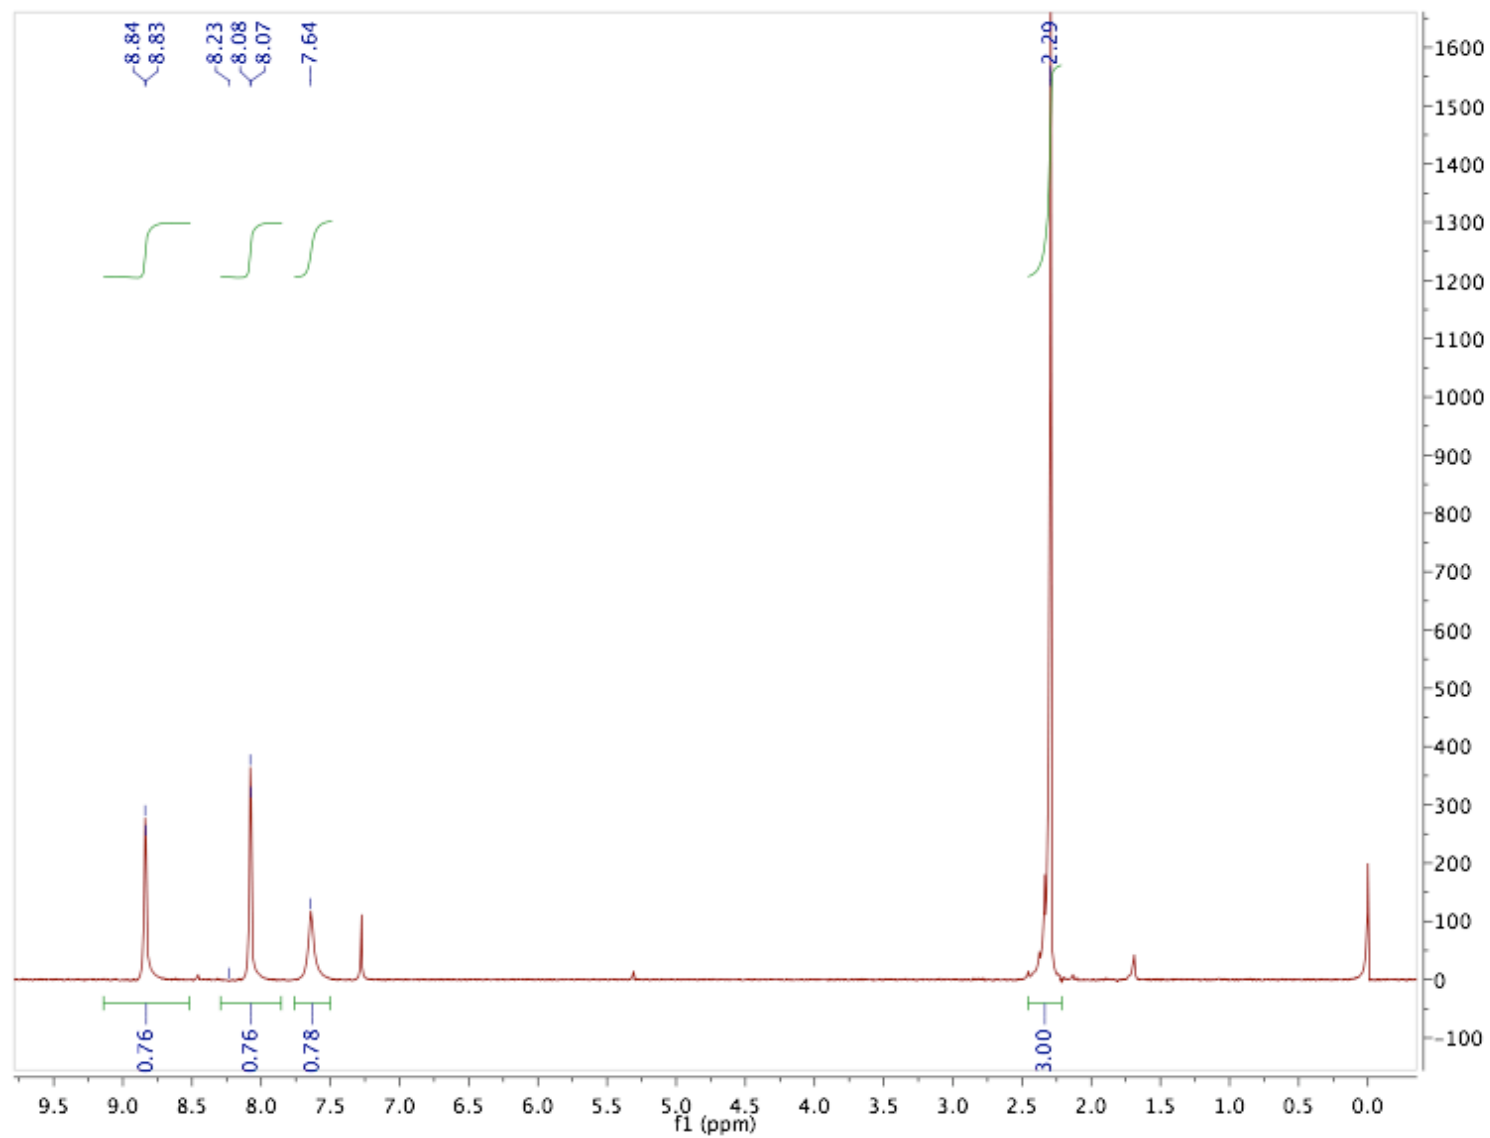

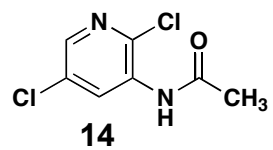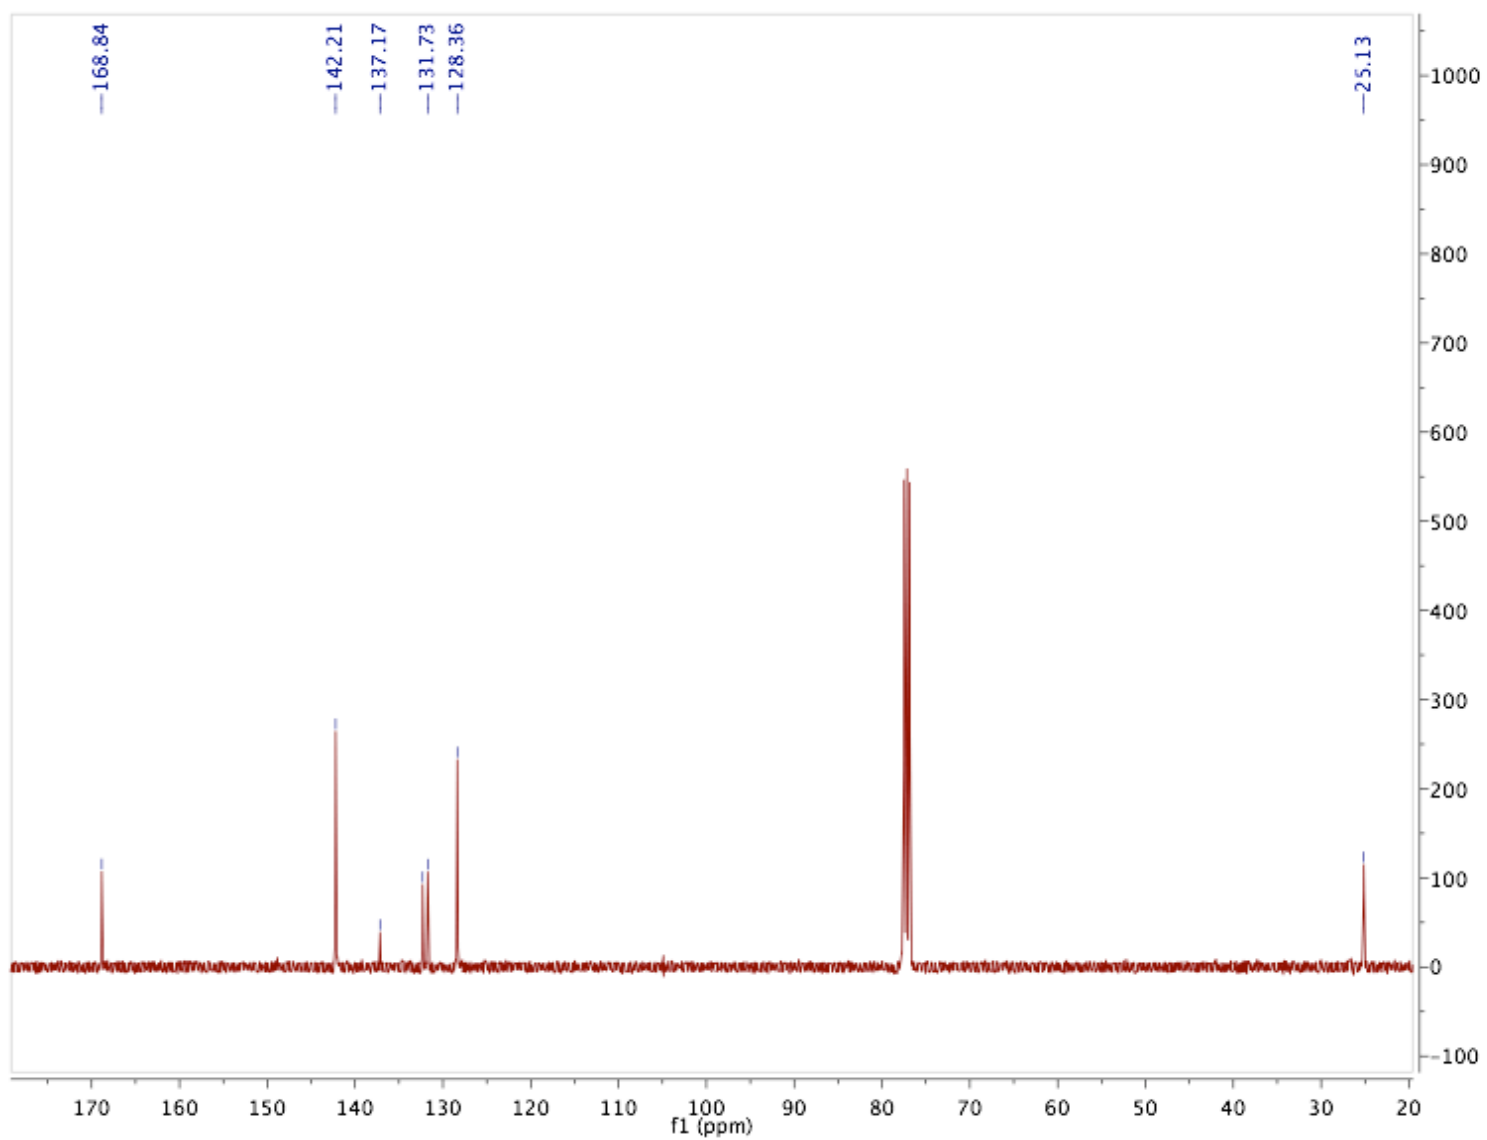



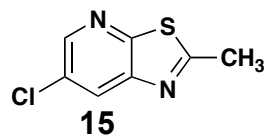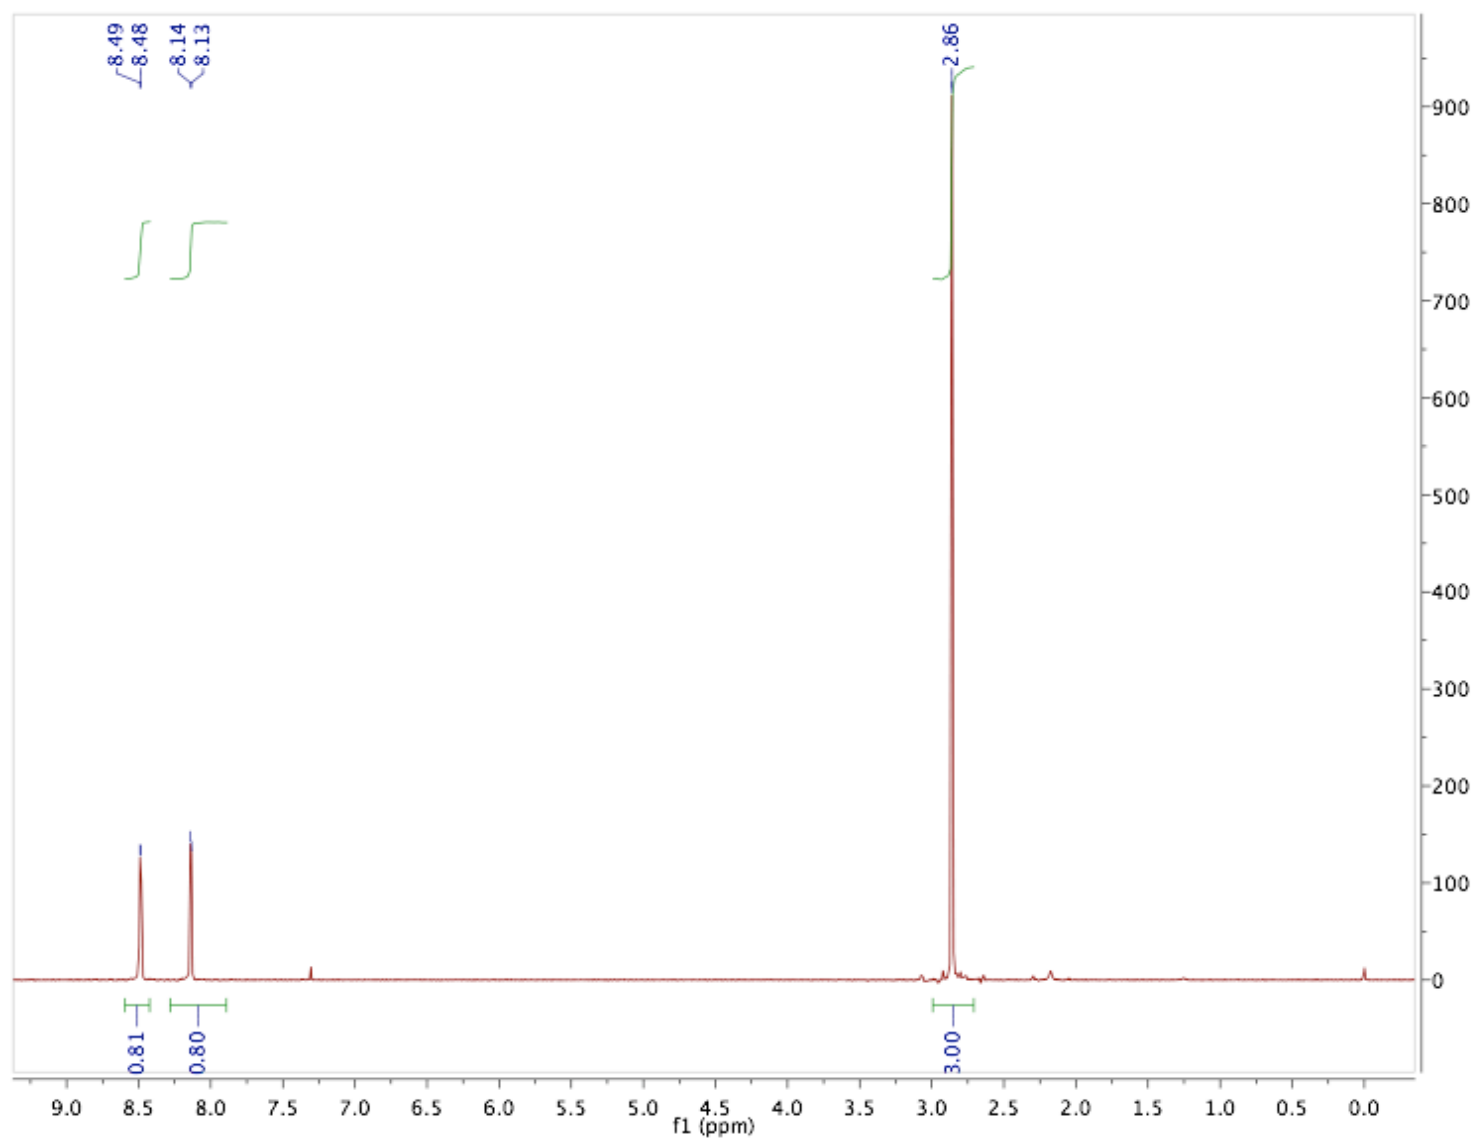

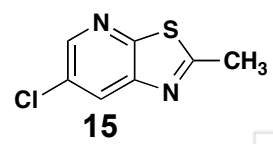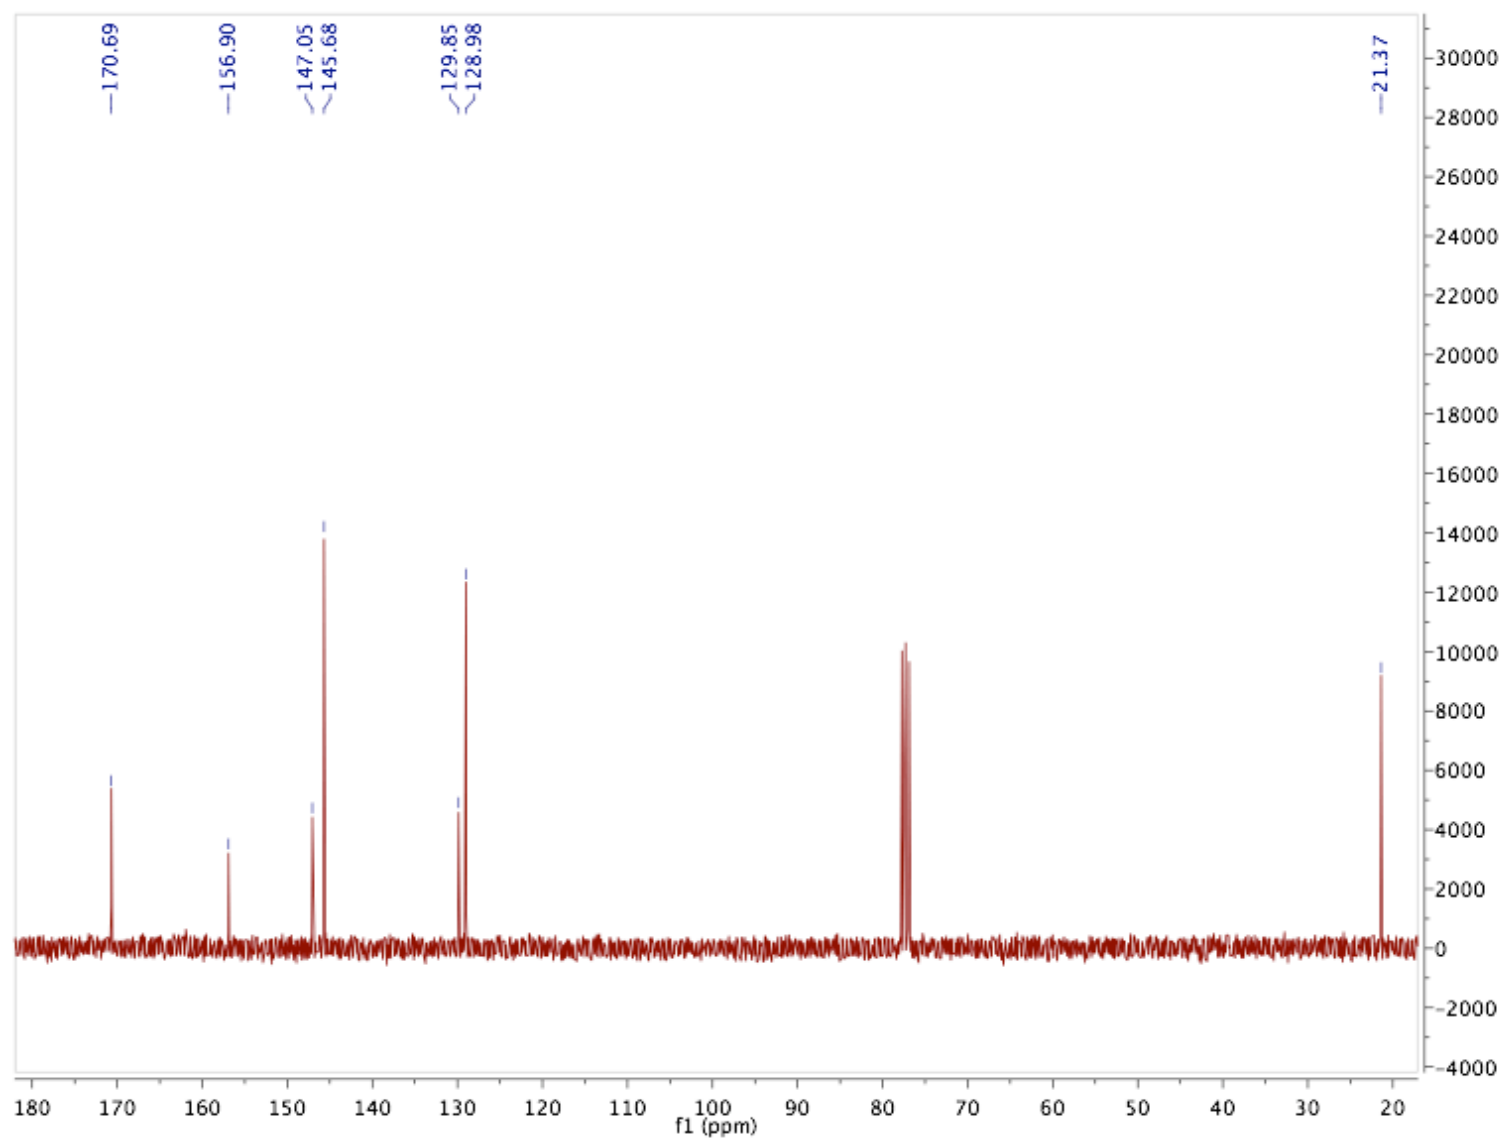

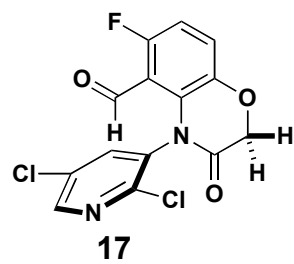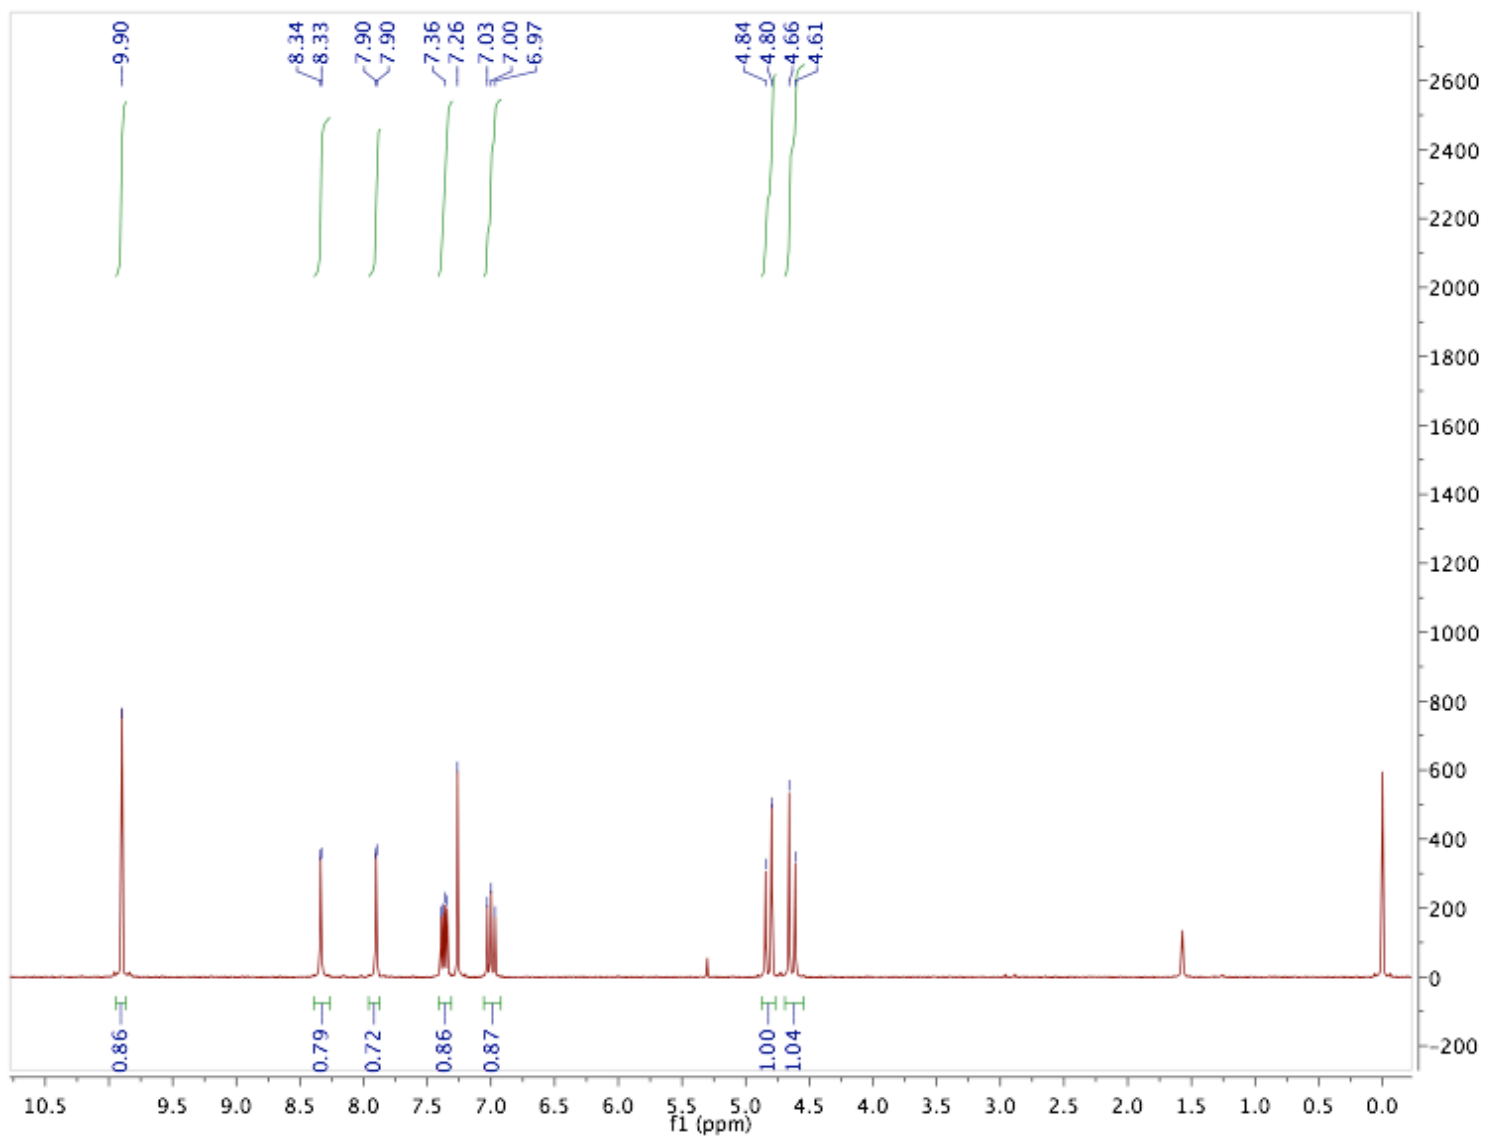

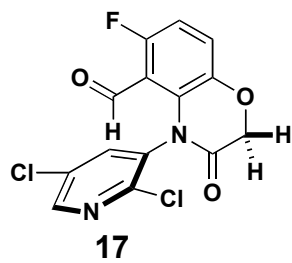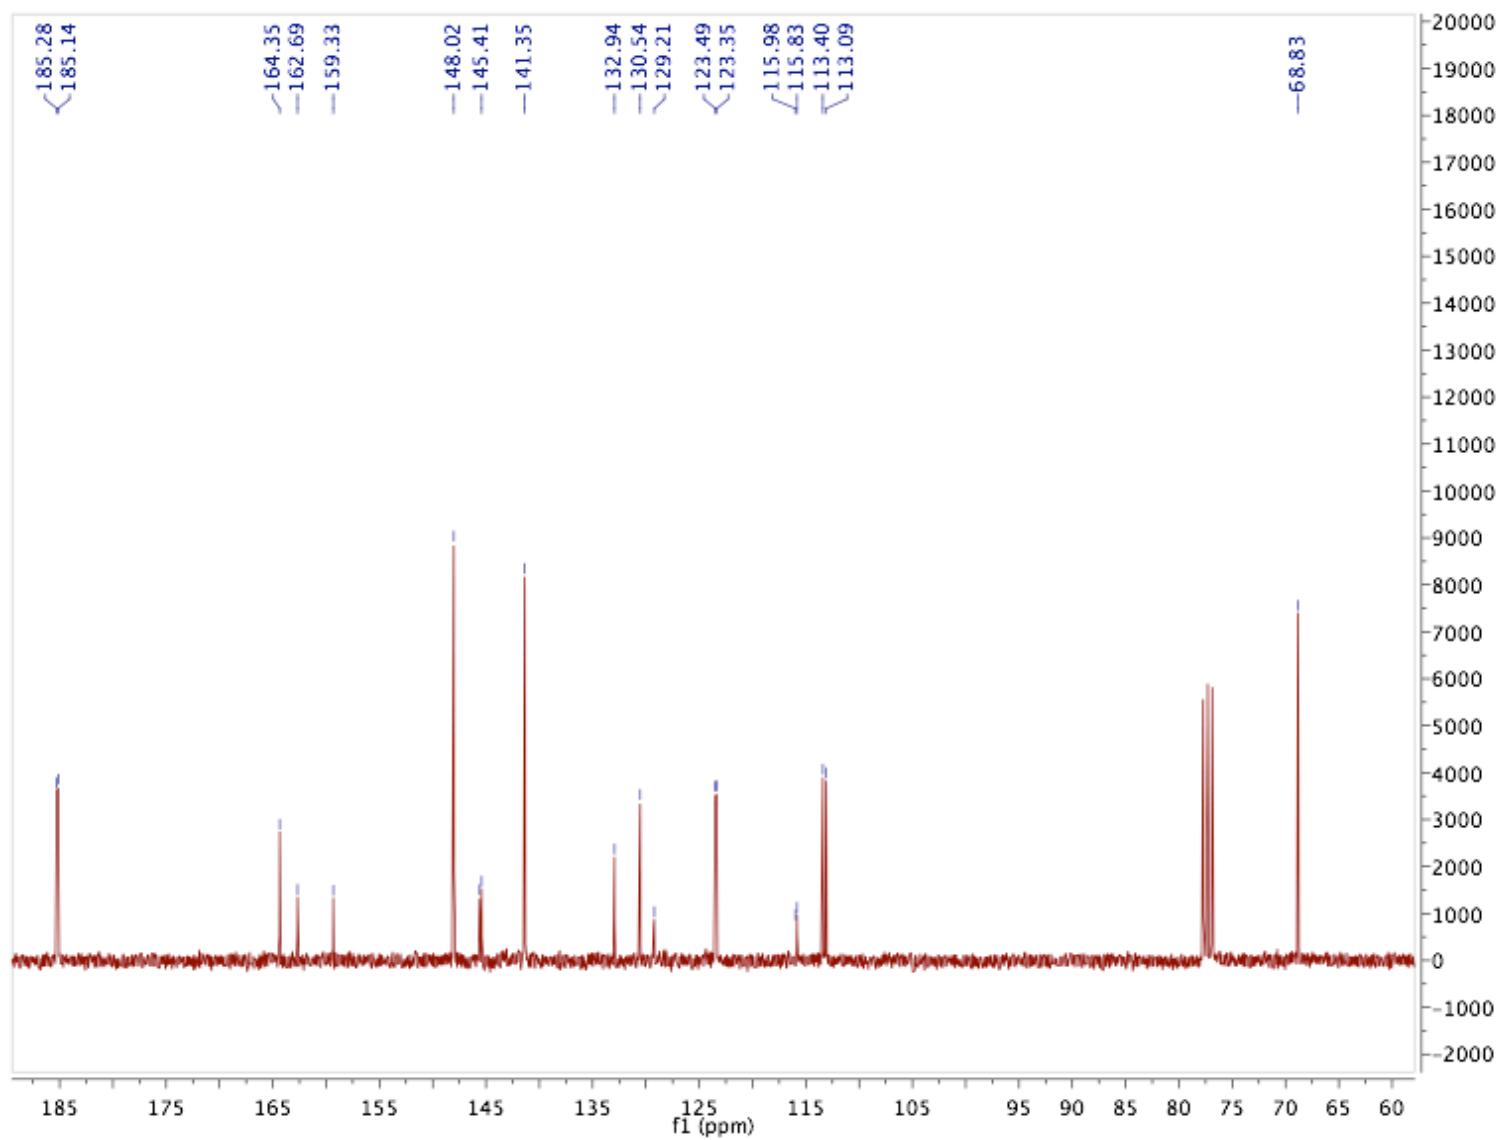

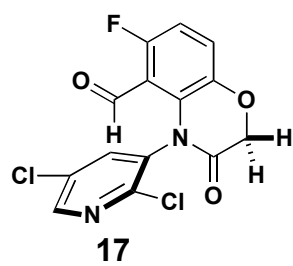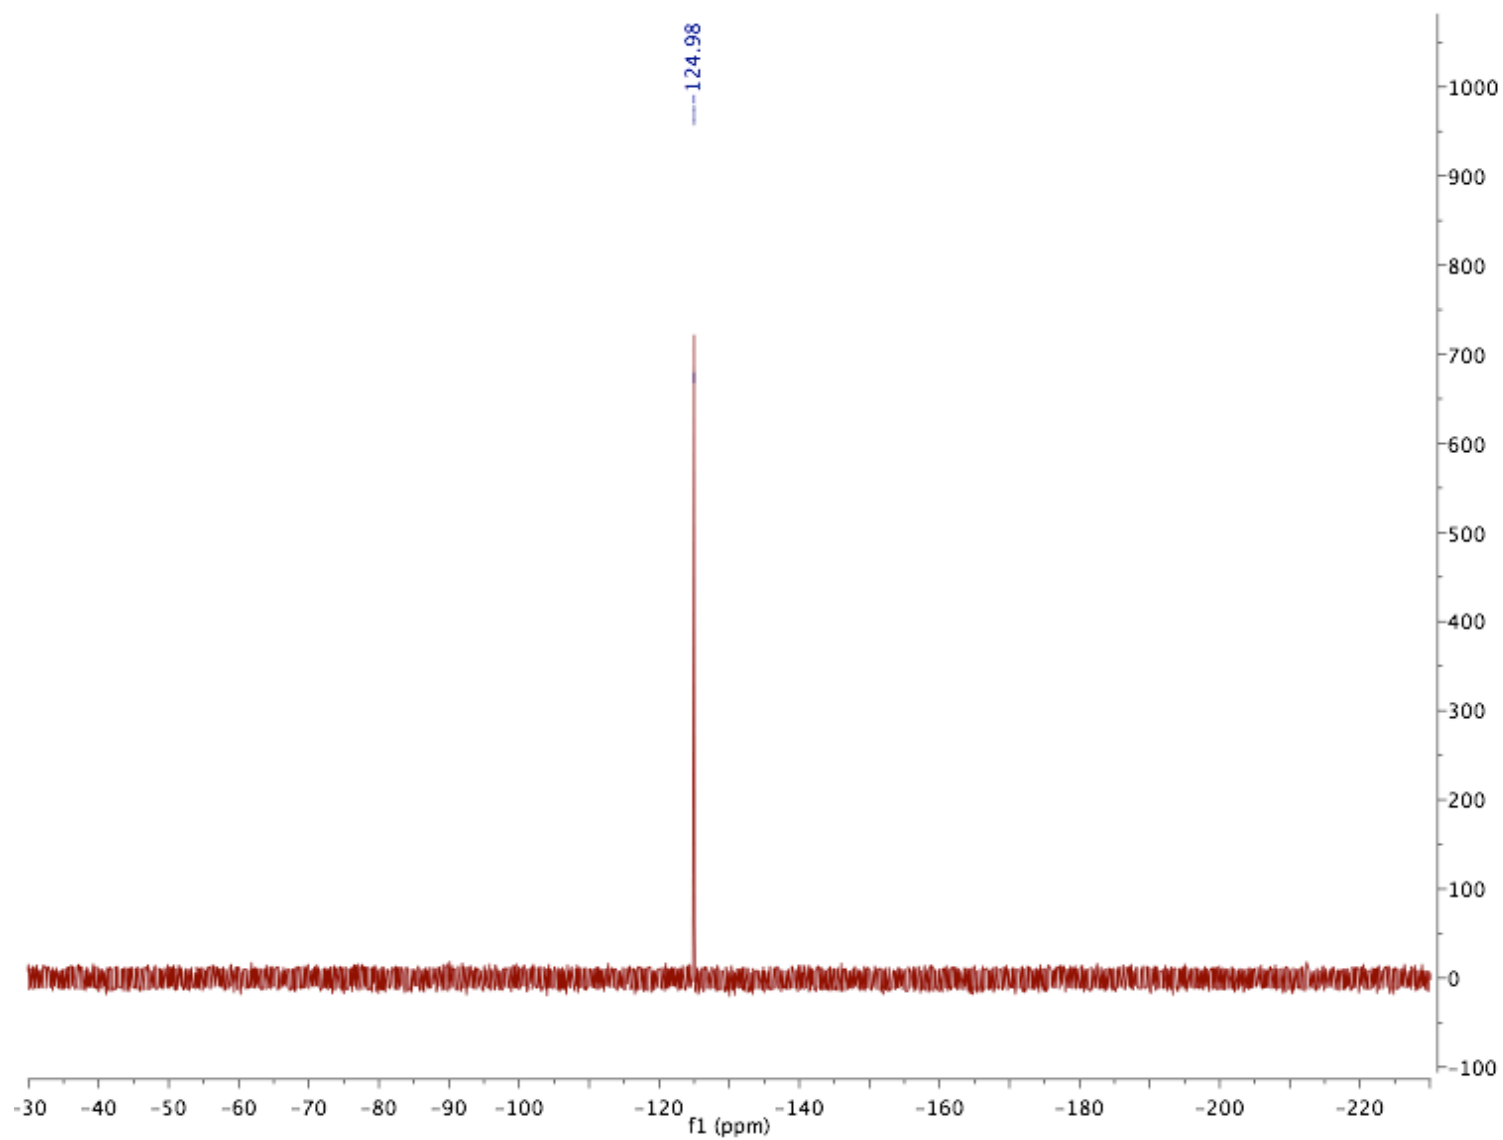

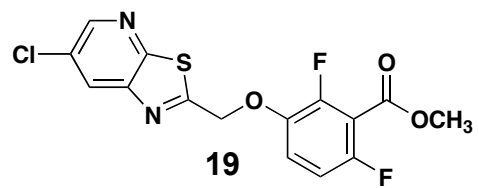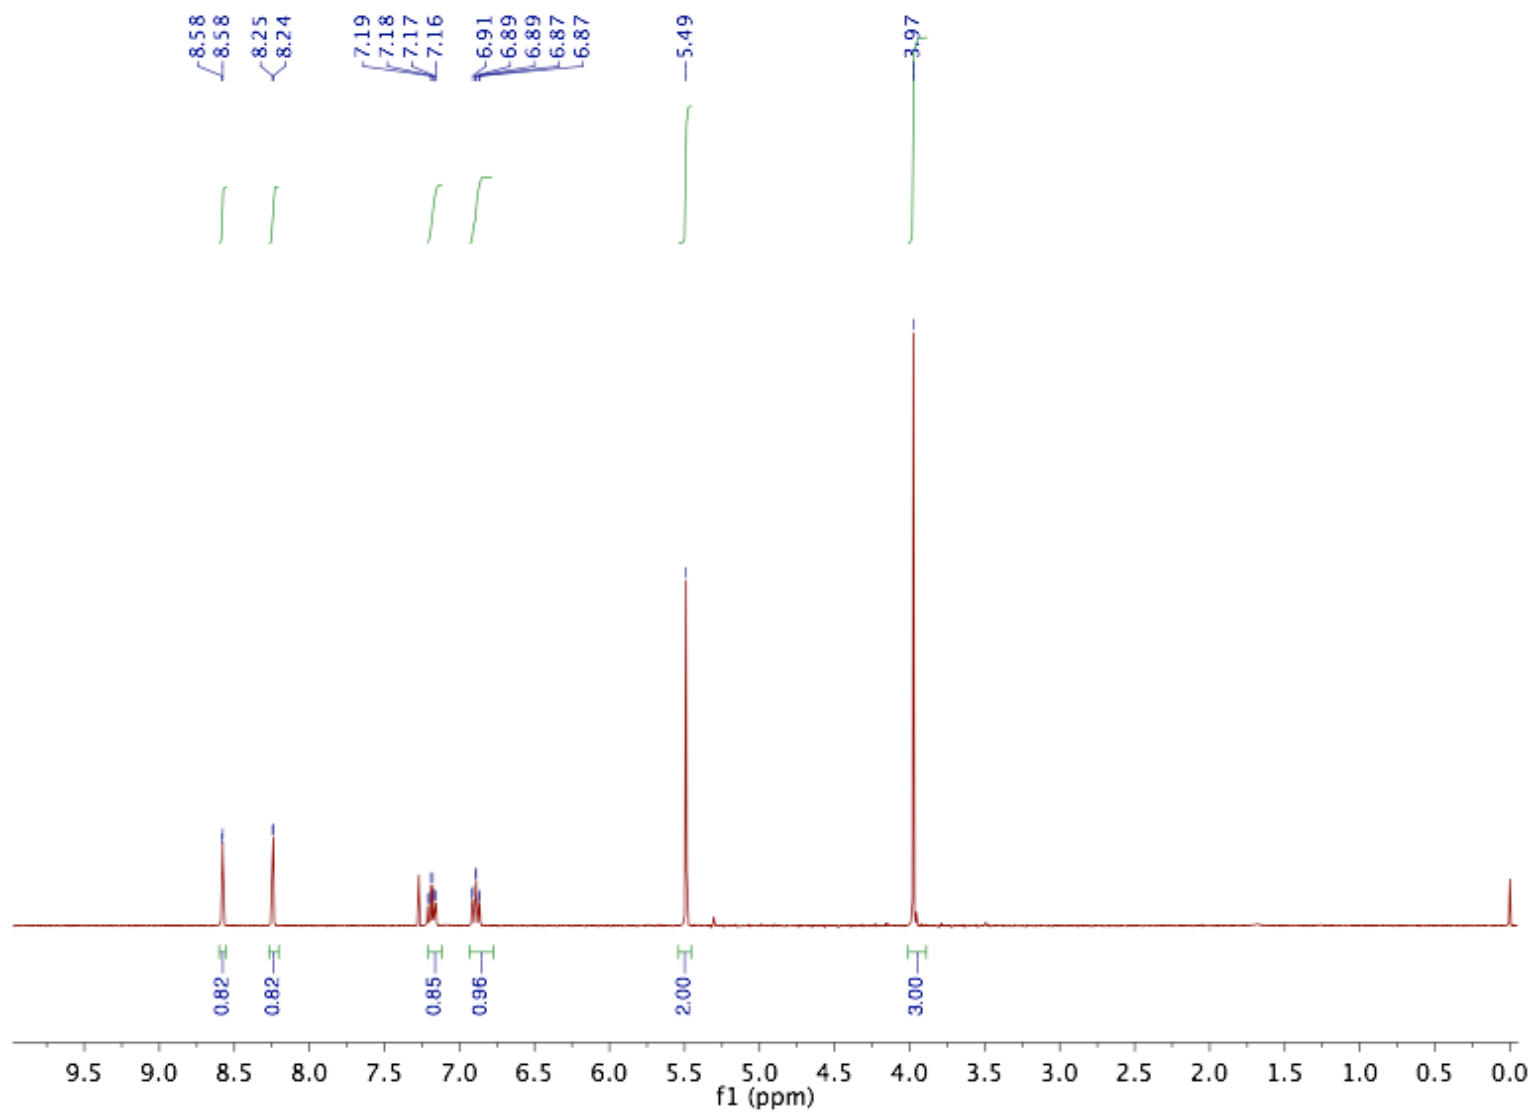

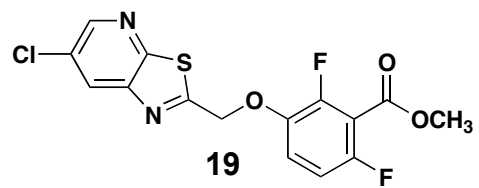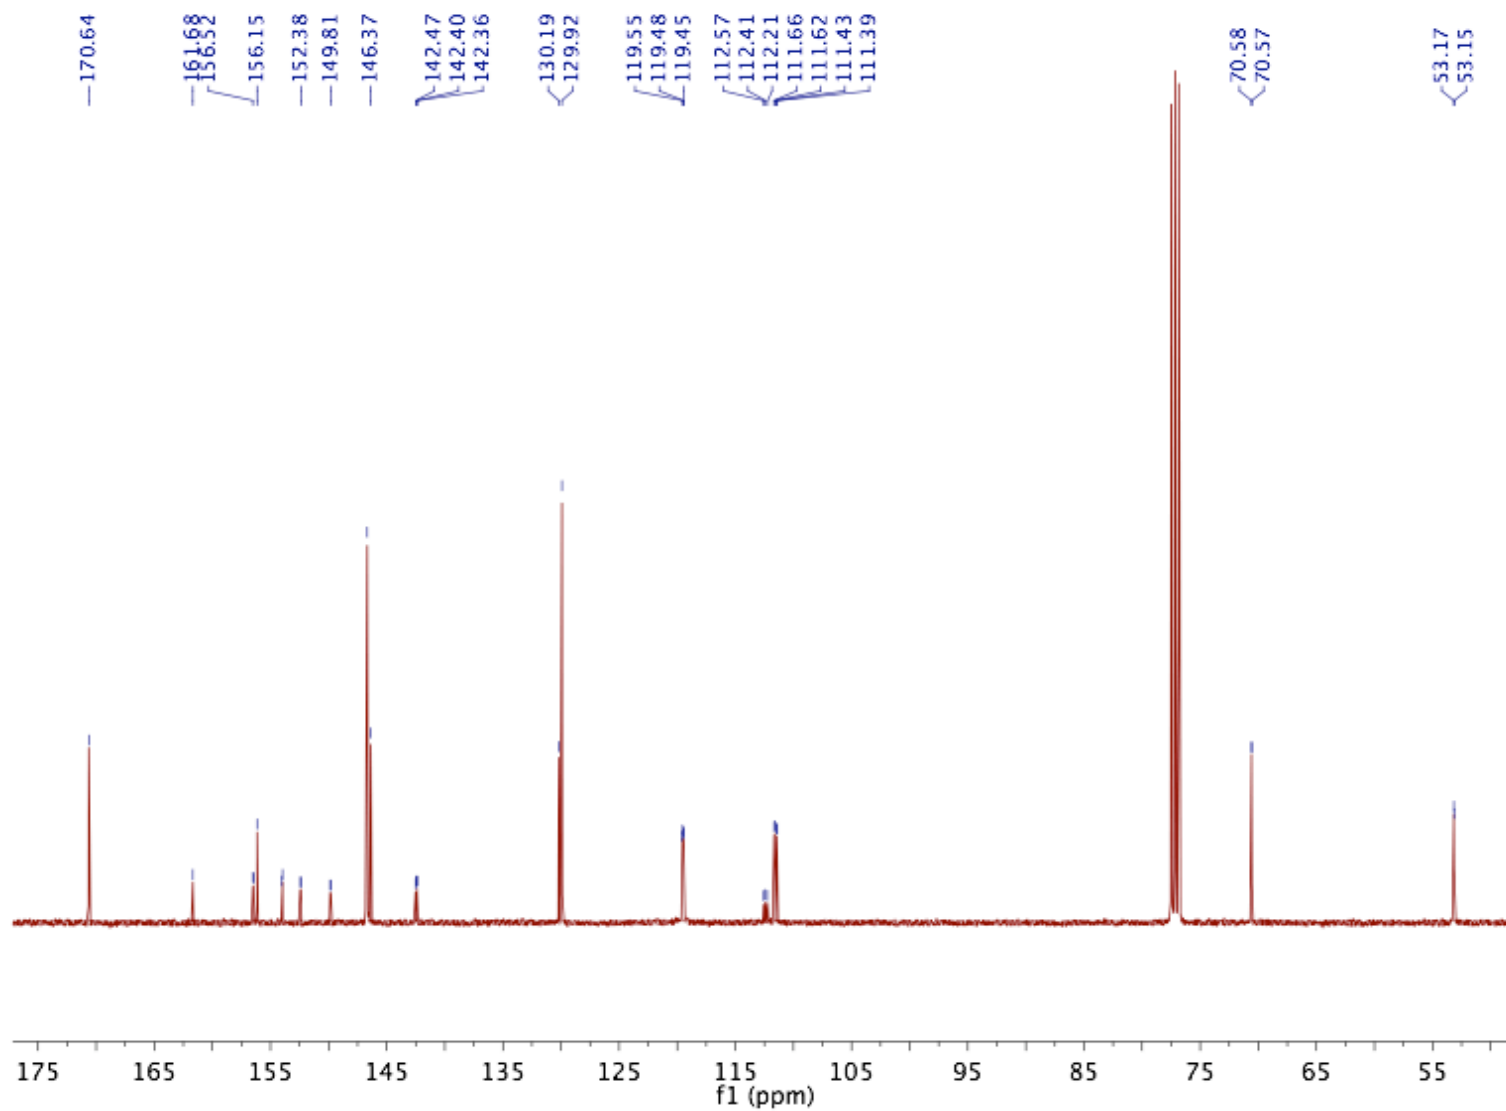

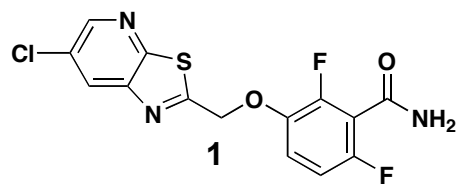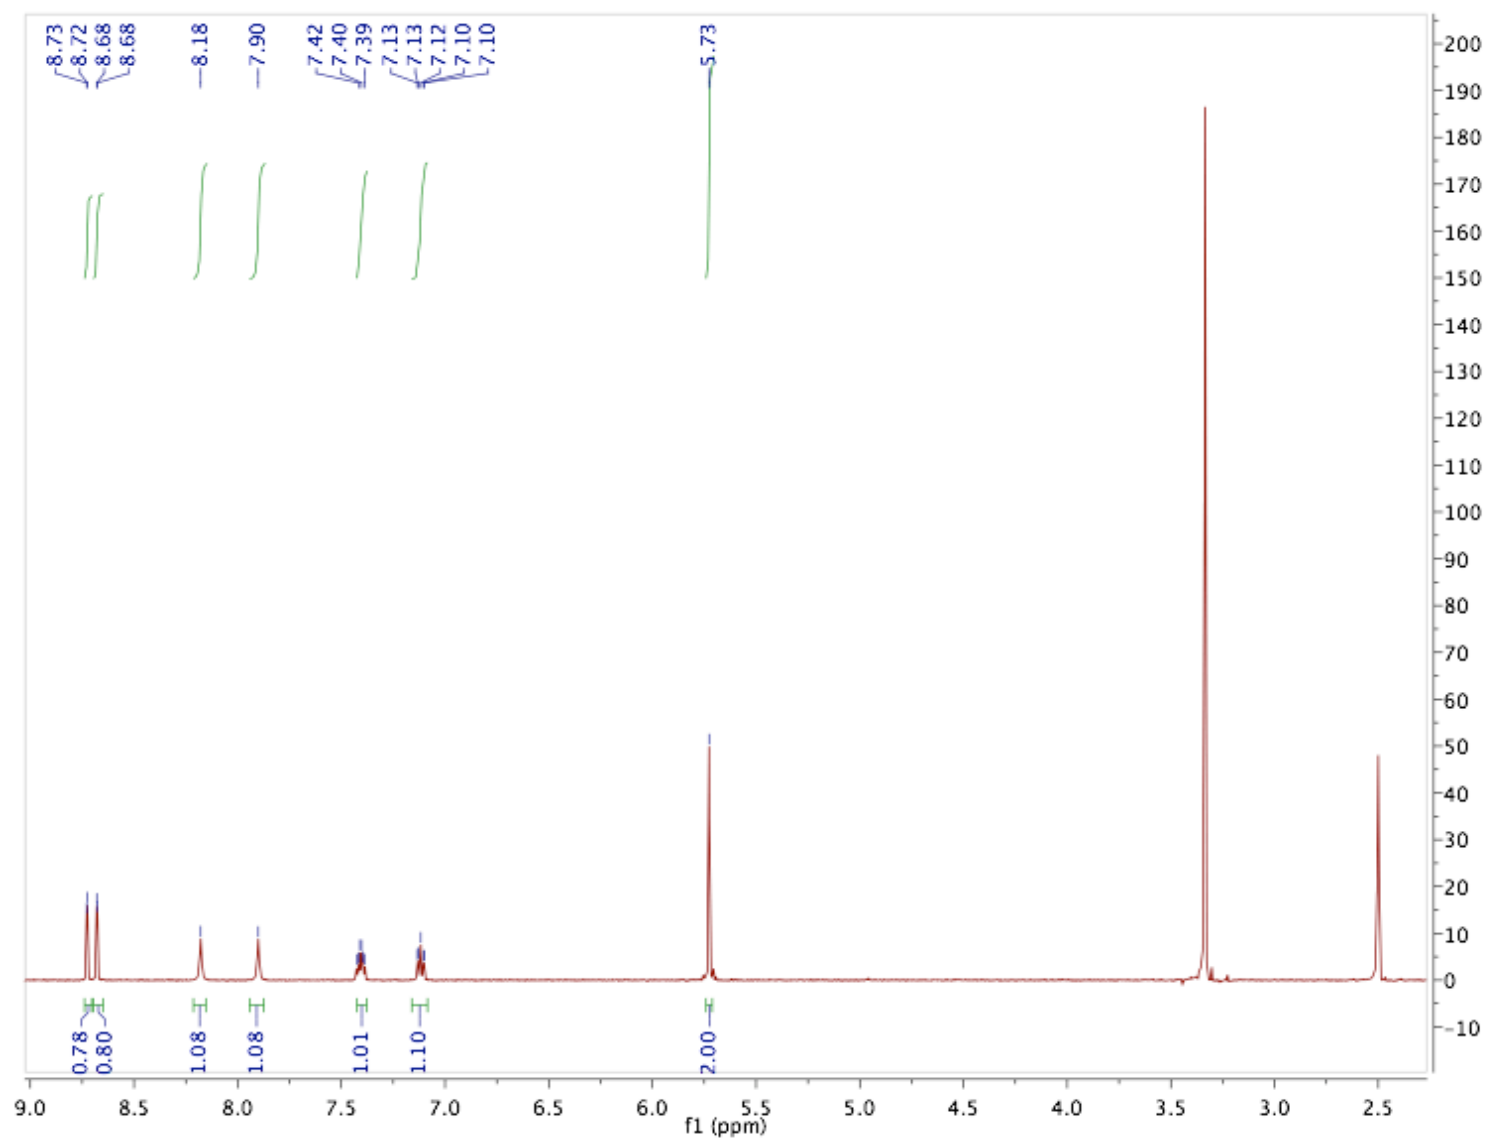



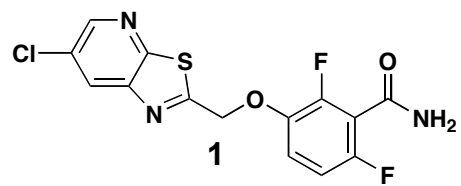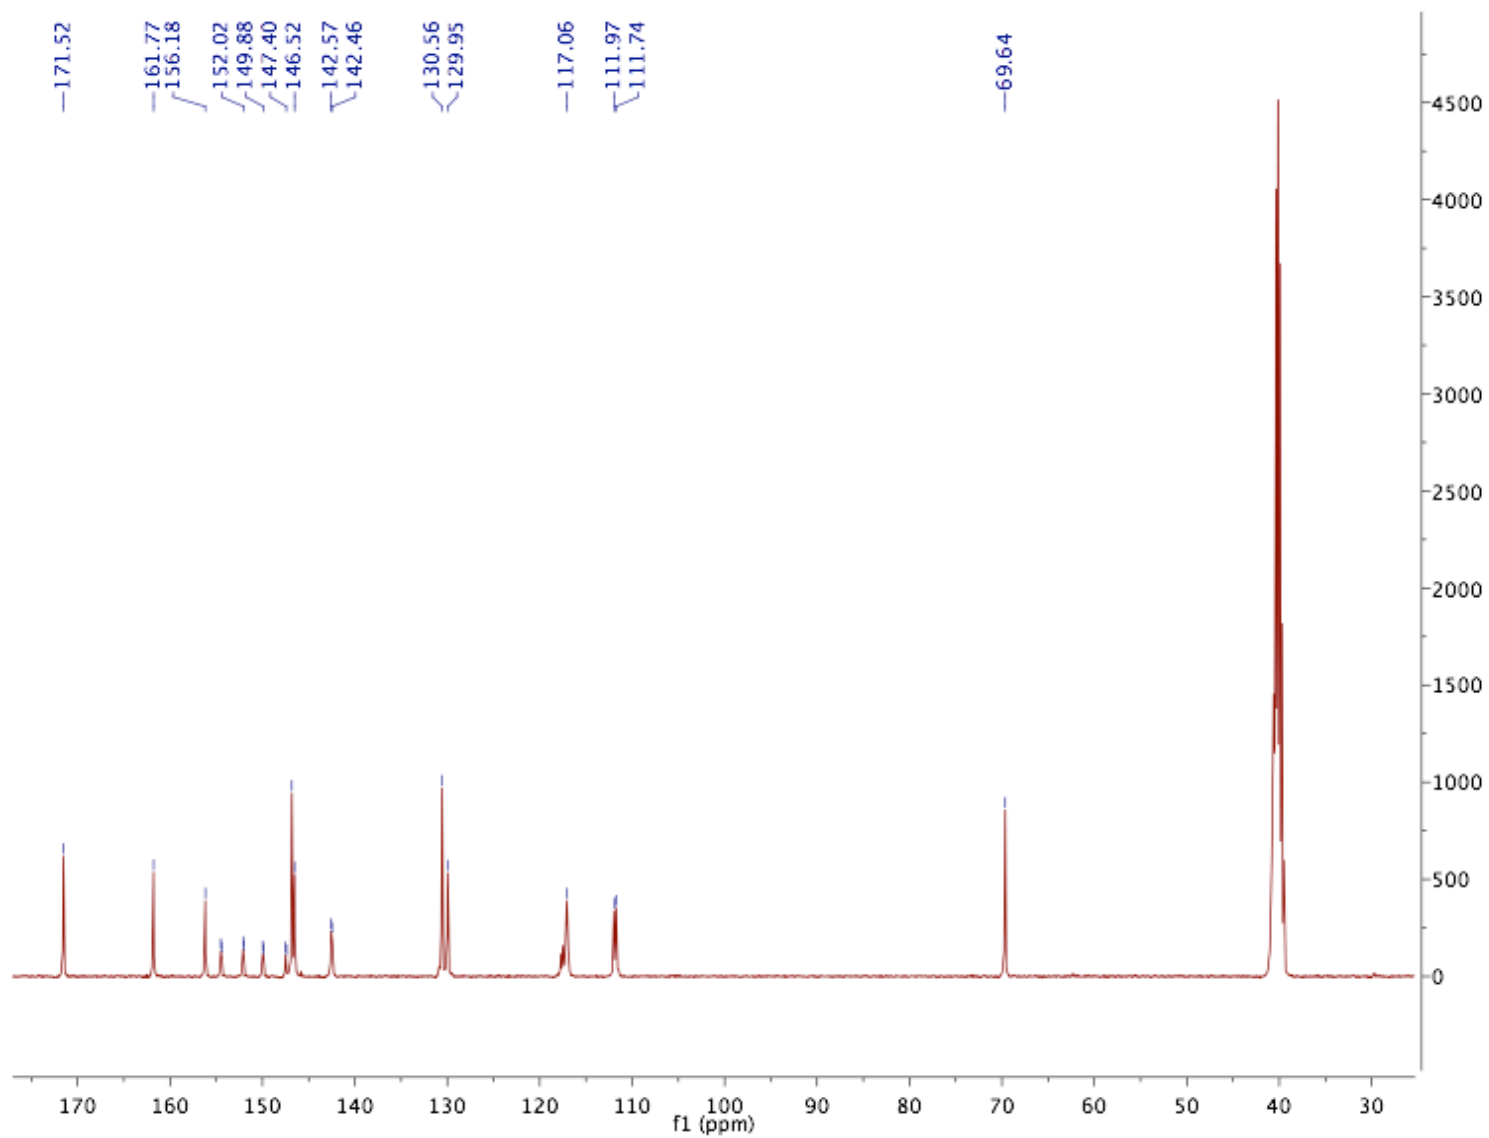

## Complete References 7a,b &amp; 10:

7a) Haydon, D. J.; Stokes, N. R.; Ure, R.; Galbraith, G.; Bennett, J. M.; Brown, D. R.; Baker, P. J.; Barynin, V. V.; Rice, D. W.; Sedelnikova, S. E.; Heal, J. R.; Sheridan, J. M.; Aiwale, S. T.; Chauhan, P. K.; Srivastava, A.; Taneja, A.; Collins, I.; Errington, J.; Czaplewski, L. G. *Science (Washington, DC, U. S.)* **2008**, *321*, 1673-1675.

7b) Czaplewski, L. G.; Collins, I.; Boyd, E. A.; Brown, D.; East, S. P.; Gardiner, M.; Fletcher, R.; Haydon, D. J.; Henstock, V.; Ingram, P.; Jones, C.; Noula, C.; Kennison, L.; Rockley, C.; Rose, V.; Thomaidis-Brears, H. B.; Ure, R.; Whittaker, M.; Stokes, N. R. *Bioorg. Med. Chem. Lett.* **2009**, *19*, 524-527.

10) Haydon, D. J.; Bennett, J. M.; Brown, D.; Collins, I.; Galbraith, G.; Lancett, P.; Macdonald, R.; Stokes, N. R.; Chauhan, P. K.; Sutariya, J. K.; Nayal, N.; Srivastava, A.; Beanland, J.; Hall, R.; Henstock, V.; Noula, C.; Rockley, C.; Czaplewski, L. *J. Med. Chem.* **2010**, *53*, 3927-3936.

**X-ray Crystallography and Data Collection.** The crystals were obtained by slow evaporation of an acetone solution. A suitable crystal was removed from the vial and mounted on a MiTeGen mount and placed in the CRYO Industries N<sub>2</sub> cold stream of a Bruker SMART Apex II DUO X-ray diffractometer. Data collection was carried out with Mo K $\alpha$  radiation, data reduction was carried out with SAINT, and a correction for absorption was applied using SADABS.<sup>1</sup> The structure was solved with the use of SHELXS97 and refined with SHELXL97.<sup>2</sup> Hydrogen atoms were added geometrically and refined with a riding model. Crystal data and selected data collection and refinement parameters are presented in Table S1.

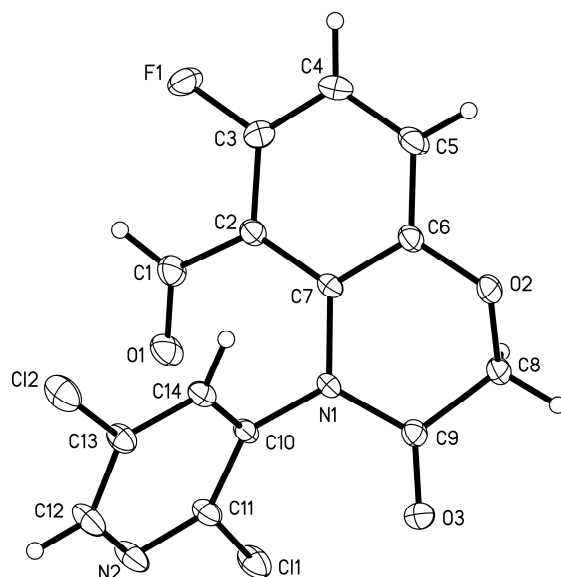

---

<sup>(1)</sup> Bruker AXS, **2010**. APEX2, SAINT, SADABS, TWINABS. Bruker AXS Inc. Madison, Wisconsin, USA.

<sup>(2)</sup> Sheldrick, G. M. *Acta Crystallogr. Sect. A* **2008**, *64*, 112.

Table S1. Crystal data and structure refinement for Compound **17**.

|                                   |                                                                               |                   |
|-----------------------------------|-------------------------------------------------------------------------------|-------------------|
| Identification code               | mn2021                                                                        |                   |
| Empirical formula                 | C <sub>14</sub> H <sub>7</sub> Cl <sub>2</sub> FN <sub>2</sub> O <sub>3</sub> |                   |
| Formula weight                    | 341.12                                                                        |                   |
| Temperature                       | 87(2) K                                                                       |                   |
| Wavelength                        | 0.71073 Å                                                                     |                   |
| Crystal system                    | triclinic                                                                     |                   |
| Space group                       | <i>P</i> <i>1</i>                                                             |                   |
| Unit cell dimensions              | a = 8.4638(11) Å                                                              | α = 63.0260(10)°. |
|                                   | b = 9.5592(13) Å                                                              | β = 77.877(2)°.   |
|                                   | c = 10.0336(14) Å                                                             | γ = 71.216(2)°.   |
| Volume                            | 682.97(16) Å <sup>3</sup>                                                     |                   |
| Z                                 | 2                                                                             |                   |
| Density (calculated)              | 1.659 Mg/m <sup>3</sup>                                                       |                   |
| Absorption coefficient            | 0.501 mm <sup>-1</sup>                                                        |                   |
| F(000)                            | 344                                                                           |                   |
| Crystal size                      | 0.41 x 0.34 x 0.22 mm <sup>3</sup>                                            |                   |
| Crystal color and habit           | colorless block                                                               |                   |
| Diffractometer                    | Bruker SMART Apex DUO                                                         |                   |
| θ range for data collection       | 2.28 to 29.13°.                                                               |                   |
| Index ranges                      | -11 ≤ h ≤ 11, -13 ≤ k ≤ 13, -13 ≤ l ≤ 13                                      |                   |
| Reflections collected             | 9949                                                                          |                   |
| Independent reflections           | 3652 [R(int) = 0.0232]                                                        |                   |
| Observed reflections (I > 2σ(I))  | 3535                                                                          |                   |
| Completeness to θ = 29.13°        | 99.4 %                                                                        |                   |
| Absorption correction             | Semi-empirical from equivalents                                               |                   |
| Max. and min. transmission        | 0.898 and 0.821                                                               |                   |
| Solution method                   | SHELXS97 (Sheldrick, 2008)                                                    |                   |
| Refinement method                 | SHELXL97 (Sheldrick, 2008)                                                    |                   |
| Data / restraints / parameters    | 3652 / 0 / 199                                                                |                   |
| Goodness-of-fit on F <sup>2</sup> | 1.084                                                                         |                   |
| Final R indices [I > 2σ(I)]       | R1 = 0.0319, wR2 = 0.0865                                                     |                   |
| R indices (all data)              | R1 = 0.0327, wR2 = 0.0871                                                     |                   |
| Largest diff. peak and hole       | 0.542 and -0.392 e.Å <sup>-3</sup>                                            |                   |
